# Supplementary material for: Cohort profile: Study of Transition, Outcomes and Gender (STRONG) to assess health status of transgender people
Source: PubMed Central journal article supplement — BMJ Open. 2017 Dec 27;7(12):e018121. doi: 10.1136/bmjopen-2017-018121 (PMC5770907; doi:10.1136/bmjopen-2017-018121), 2017-12-27
Supplement: bmjopen-2017-018121supp001.pdf [file bmjopen-2017-018121supp001.pdf]

**SUPPLEMENTAL MATERIALS****Supplemental Table 1: NDC codes reflecting medications used for TF gender affirmation**

| <b>Label</b>                                                 | <b>NDC Codes</b> |
|--------------------------------------------------------------|------------------|
| BICALUTAMIDE tablet                                          | 16729-023-01     |
| BICALUTAMIDE tablet                                          | 60505-2642-1     |
| BICALUTAMIDE tablet                                          | 0781-5409-01     |
| BICALUTAMIDE tablet                                          | 41616-485-08     |
| BICALUTAMIDE tablet, film coated                             | 51991-560-01     |
| BICALUTAMIDE tablet, film coated                             | 65841-613-01     |
| BICALUTAMIDE tablet, film coated                             | 67253-191-03     |
| BICALUTAMIDE tablet, film coated                             | 0378-7017-93     |
| BICALUTAMIDE tablet, film coated                             | 16714-571-01     |
| BICALUTAMIDE tablet, film coated                             | 47335-485-08     |
| BICALUTAMIDE tablet, film coated                             | 63672-0005-0     |
| BICALUTAMIDE tablet, film coated                             | 0093-0220-01     |
| BICALUTAMIDE tablet, film coated                             | 68382-224-01     |
| BICALUTAMIDE (bicalutamide) tablet, film coated [Repackaged] | 42291-168-30     |
| BICALUTAMIDE tablet [Repackaged]                             | 68084-612-11     |
| BICALUTAMIDE tablet [Repackaged]                             | 63629-5321-1     |
| BICALUTAMIDE tablet [Repackaged]                             | 0904-6019-46     |
| BICALUTAMIDE tablet, film coated [Repackaged]                | 69189-0298-1     |
| BICALUTAMIDE tablet, film coated [Repackaged]                | 60429-177-01     |
| BICALUTAMIDE tablet, film coated [Repackaged]                | 60429-226-05     |
| BICALUTAMIDE tablet, film coated [Repackaged]                | 54868-6133-0     |
| CASODEX (bicalutamide) tablet                                | 0310-0705-10     |
| CASODEX (bicalutamide) tablet [Repackaged]                   | 54868-4503-0     |
| NILANDRON (nilutamide) tablet                                | 59212-111-10     |
| NILANDRON (nilutamide) tablet                                | 24987-111-14     |
| NILANDRON (nilutamide) tablet                                | 0088-1111-14     |
| ALDACTONE- spironolactone tablet, film coated                | 0025-1001-31     |
| AVODART (dutasteride) capsule, liquid filled                 | 0173-0712-02     |
| AVODART (dutasteride) capsule, liquid filled (Repackaged)    | 54569-6607-0     |
| AVODART (dutasteride) capsule, liquid filled (Repackaged)    | 69189-0712-1     |
| AVODART (dutasteride) capsule, liquid filled (Repackaged)    | 35356-210-30     |

|                                                                  |              |
|------------------------------------------------------------------|--------------|
| AVODART (dutasteride) capsule, liquid filled (Repackaged)        | 54868-5114-0 |
| CENESTIN - synthetic conjugated estrogens, a tablet, film coated | 54868-1432-0 |
| CLIMARA (estradiol) patch [Repackaged]                           | 50419-451-01 |
| CLIMARA PRO (estradiol and levonorgestrel) patch [Repackaged]    | 50419-491-04 |
| CLIMARA PRO (estradiol and levonorgestrel) patch                 | 54868-5570-0 |
| DELESTROGEN- estradiol valerate injection                        | 42023-110-01 |
| ESTRADIOL VALERATE AND ESTRADIOL VALERATE/DIENOGEST kit          | 0781-4110-15 |
| ESTRADIOL VALERATE injection                                     | 42023-134-01 |
| ESTRADIOL VALERATE injection, solution                           | 0574-0870-05 |
| DEPO-ESTRADIOL (estradiol cypionate) injection                   | 0009-0271-01 |
| DEPO-ESTRADIOL (estradiol cypionate) injection [Repackaged]      | 54868-1729-0 |
| DIVIGEL (estradiol) gel                                          | 0245-0880-30 |
| DIVIGEL (estradiol) gel                                          | 68025-065-01 |
| DIVIGEL (estradiol) gel [Repackaged]                             | 54868-6056-0 |
| DUTASTERIDE capsule                                              | 0591-2292-19 |
| DUTASTERIDE capsule                                              | 65162-750-03 |
| DUTASTERIDE capsule                                              | 51991-749-33 |
| DUTASTERIDE capsule                                              | 0054-0395-13 |
| DUTASTERIDE capsule, liquid filled                               | 60505-3877-3 |
| DUTASTERIDE capsule, liquid filled                               | 0173-7077-00 |
| DUTASTERIDE capsule, liquid filled                               | 0115-1438-08 |
| DUTASTERIDE capsule, liquid filled                               | 62112-8068-1 |
| DUTASTERIDE capsule, liquid filled                               | 64980-224-03 |
| DUTASTERIDE capsule, liquid filled                               | 64380-763-04 |
| DUTASTERIDE capsule, liquid filled                               | 0093-5655-56 |
| DUTASTERIDE (dutasteride) capsule [Repackaged]                   | 42291-257-90 |
| DUTASTERIDE capsule [Repackaged]                                 | 63187-657-30 |
| DUTASTERIDE AND TAMSULOSIN HYDROCHLORIDE capsule                 | 10370-280-09 |
| DUTASTERIDE AND TAMSULOSIN HYDROCHLORIDE capsule                 | 0591-3771-19 |
| JALYN (dutasteride and tamsulosin hydrochloride) capsule         | 0173-0809-13 |
| JALYN (dutasteride and tamsulosin hydrochloride) capsule         | 54868-6328-0 |
| ELESTRIN (estradiol gel 0.06%) gel, metered                      | 0037-4801-35 |
| ELESTRIN (estradiol) gel                                         | 18860-490-02 |
| ELESTRIN (estradiol) gel                                         | 18860-480-01 |

|                                                                 |              |
|-----------------------------------------------------------------|--------------|
| ENJUVIA (synthetic conjugated estrogens, b) tablet, film coated | 51285-406-02 |
| ENJUVIA (synthetic conjugated estrogens, b) tablet [Repackaged] | 54868-6163-0 |
| ESTRACE (estradiol) cream                                       | 0430-3754-14 |
| ESTRACE (estradiol) tablet                                      | 0430-0720-24 |
| DIVIGEL (estradiol) gel                                         | 0245-0880-30 |
| DIVIGEL (estradiol) gel                                         | 68025-065-01 |
| estraderm (estradiol) patch, extended release                   | 0083-2310-08 |
| ESTRADIOL patch                                                 | 0378-4640-16 |
| ESTRADIOL patch                                                 | 0378-3349-16 |
| ESTRADIOL patch, extended release                               | 0781-7129-40 |
| ESTRADIOL pellet                                                | 69761-022-01 |
| ESTRADIOL pellet                                                | 69761-012-01 |
| ESTRADIOL pellet                                                | 69761-020-01 |
| ESTRADIOL pellet                                                | 69761-006-01 |
| ESTRADIOL pellet                                                | 69761-018-01 |
| ESTRADIOL pellet                                                | 69761-010-01 |
| ESTRADIOL pellet                                                | 69761-025-01 |
| ESTRADIOL pellet                                                | 69761-015-01 |
| ESTRADIOL tablet                                                | 65162-226-21 |
| ESTRADIOL tablet                                                | 0555-0886-02 |
| ESTRADIOL tablet                                                | 23155-013-01 |
| ESTRADIOL tablet                                                | 0378-1452-01 |
| ESTRADIOL tablet                                                | 0591-0487-01 |
| ESTRADIOL TRANSDERMAL SYSTEM (estradiol) patch                  | 47781-204-04 |
| GUNA-BETA-ESTRADIOL (estradiol) solution/ drops                 | 17089-359-18 |
| Innofem (Estradiol) tablet, film coated                         | 0169-1842-81 |
| DIVIGEL (estradiol) gel [Repackaged]                            | 54868-6056-0 |
| ESTRADIOL (estradiol) tablet [Repackaged]                       | 50268-290-11 |
| ESTRADIOL (estradiol) tablet [Repackaged]                       | 43063-201-01 |
| ESTRADIOL patch [Repackaged]                                    | 54868-4811-0 |
| ESTRADIOL tablet [Repackaged]                                   | 54569-4908-0 |
| ESTRADIOL tablet [Repackaged]                                   | 54569-4907-0 |
| ESTRADIOL tablet [Repackaged]                                   | 33261-667-30 |
| ESTRADIOL tablet [Repackaged]                                   | 69189-0886-1 |

|                                                                                             |              |
|---------------------------------------------------------------------------------------------|--------------|
| ESTRADIOL tablet [Repackaged]                                                               | 69189-0487-1 |
| ESTRADIOL tablet [Repackaged]                                                               | 69189-0899-1 |
| ESTRADIOL tablet [Repackaged]                                                               | 10544-069-30 |
| ESTRADIOL tablet [Repackaged]                                                               | 63629-2766-1 |
| ESTRADIOL tablet [Repackaged]                                                               | 63629-4788-1 |
| ESTRADIOL tablet [Repackaged]                                                               | 63629-3755-1 |
| ESTRADIOL tablet [Repackaged]                                                               | 63629-5208-1 |
| ESTRADIOL tablet [Repackaged]                                                               | 55154-6242-0 |
| ESTRADIOL tablet [Repackaged]                                                               | 61919-278-30 |
| ESTRADIOL tablet [Repackaged]                                                               | 61919-198-30 |
| ESTRADIOL tablet [Repackaged]                                                               | 60429-327-01 |
| ESTRADIOL tablet [Repackaged]                                                               | 0179-0123-70 |
| ESTRADIOL tablet [Repackaged]                                                               | 0179-0073-70 |
| ESTRADIOL tablet [Repackaged]                                                               | 0179-1999-01 |
| ESTRADIOL tablet [Repackaged]                                                               | 49999-083-30 |
| ESTRADIOL tablet [Repackaged]                                                               | 43063-446-01 |
| ESTRADIOL tablet [Repackaged]                                                               | 43063-651-30 |
| ESTRADIOL tablet [Repackaged]                                                               | 55289-761-01 |
| ESTRADIOL tablet [Repackaged]                                                               | 55289-603-07 |
| ESTRADIOL tablet [Repackaged]                                                               | 54868-4030-0 |
| ESTRADIOL tablet [Repackaged]                                                               | 68788-9901-1 |
| ESTRADIOL tablet [Repackaged]                                                               | 68788-9416-1 |
| ESTRADIOL tablet [Repackaged]                                                               | 63187-482-30 |
| ESTRADIOL tablet [Repackaged]                                                               | 64205-048-30 |
| ESTRADIOL tablet [Repackaged]                                                               | 21695-613-00 |
| ESTRADIOL tablet [Repackaged]                                                               | 16590-278-30 |
| ESTRADIOL tablet [Repackaged]                                                               | 16590-052-71 |
| AX PHARMACEUTICAL (estradiol) powder                                                        | 62157-007-02 |
| ESTROGEN PHENOLIC (estradiol,) liquid                                                       | 44911-0199-1 |
| MENOSTAR (estradiol) patch [Repackaged]                                                     | 50419-455-04 |
| VAGIFEM (estradiol) tablet, film coated [Repackaged]                                        | 54868-6182-0 |
| VIVELLE DOT - estradiol patch, extended release [Repackaged]                                | 54868-4242-0 |
| ESTRADIOL / NORETHINDRONE ACETATE (estradiol and norethindrone acetate) tablet, film coated | 51991-474-28 |

|                                                                                                          |              |
|----------------------------------------------------------------------------------------------------------|--------------|
| ESTRADIOL / NORETHINDRONE ACETATE (estradiol and norethindrone acetate) tablet, film coated [Repackaged] | 54868-4677-0 |
| ESTROSTEP FE (norethindrone acetate and ethinyl estradiol and ferrous fumarate) kit                      | 0430-0570-14 |
| ESTROSTEP FE (norethindrone acetate and ethinyl estradiol and ferrous fumarate) kit                      | 0430-0005-31 |
| GILDESS 24 FE (norethindrone acetate and ethinyl estradiol and ferrous fumarate)                         | 0603-7610-01 |
| GILDESS FE 1.5/30 (norethindrone acetate, ethinyl estradiol and ferrous fumarate) kit                    | 0603-7608-01 |
| GILDESS FE 1/20 (norethindrone acetate, ethinyl estradiol and ferrous fumarate) kit                      | 0603-7609-01 |
| JUNEL FE 24 (norethindrone acetate and ethinyl estradiol and ferrous fumarate) kit                       | 0093-5328-28 |
| LO LOESTRIN FE (norethindrone acetate and ethinyl estradiol, ethinyl estradiol and ferrous fumarate) kit | 0430-0420-14 |
| LOESTRIN 24 FE (norethindrone acetate and ethinyl estradiol, and ferrous fumarate) kit                   | 0430-0530-14 |
| MICROGESTIN 24 FE (norethindrone acetate and ethinyl estradiol and ferrous fumarate) kit                 | 52544-167-31 |
| MINASTRIN 24 FE (norethindrone acetate and ethinyl estradiol, and ferrous fumarate) kit                  | 0430-0535-14 |
| NORETHINDRONE ACETATE AND ETHINYL ESTRADIOL ( norethindrone acetate and ethinyl estradiol ) kit          | 0378-7283-53 |
| NORETHINDRONE ACETATE AND ETHINYL ESTRADIOL ( norethindrone acetate and ethinyl estradiol ) kit          | 0378-7301-53 |
| NORETHINDRONE ACETATE AND ETHINYL ESTRADIOL AND FERROUS FUMARATE (" , and " , and ") kit                 | 0430-0539-14 |
| NORETHINDRONE ACETATE AND ETHINYL ESTRADIOL tablet                                                       | 68462-656-29 |
| NORETHINDRONE ACETATE AND ETHINYL ESTRADIOL tablet                                                       | 68462-132-79 |
| NORETHINDRONE ACETATE AND ETHINYL ESTRADIOL tablet                                                       | 0378-7280-53 |
| TARINA FE 1/20 (norethindrone acetate and ethinyl estradiol) kit                                         | 50102-128-01 |
| TILIA FE (norethindrone acetate and ethinyl estradiol) kit                                               | 52544-054-31 |
| TILIA FE (norethindrone acetate and ethinyl estradiol, and ferrous fumarate) kit                         | 52544-175-72 |
| LOESTRIN 24 FE (norethindrone acetate and ethinyl estradiol, and ferrous fumarate) kit [Repackaged]      | 54868-6100-0 |
| BLISOVI 24 FE (norethindrone acetate and ethinyl estradiol) kit                                          | 68180-864-11 |
| BLISOVI FE 1.5/30 (norethindrone acetate and ethinyl estradiol) kit                                      | 68180-866-11 |
| BLISOVI FE 1/20 (norethindrone acetate and ethinyl estradiol) kit                                        | 68180-865-11 |
| FYAVOLV (norethindrone acetate and ethinyl estradiol) tablet, film coated                                | 68180-827-09 |
| GILDESS 1.5/30 (norethindrone acetate and ethinyl estradiol) tablet, film coated                         | 0603-7606-02 |
| GILDESS 1/20 (norethindrone acetate and ethinyl estradiol) tablet, film coated                           | 0603-7607-02 |
| JEVANTIQUE LO (norethindrone acetate and ethinyl estradiol) tablet                                       | 52544-236-31 |
| JINTELI (norethindrone acetate and ethinyl estradiol) tablet                                             | 0093-3122-28 |

|                                                                                                                 |              |
|-----------------------------------------------------------------------------------------------------------------|--------------|
| JUNEL 1/20 (norethindrone acetate and ethinyl estradiol) tablet                                                 | 0555-9025-42 |
| JUNEL 1.5/30 (norethindrone acetate and ethinyl estradiol) tablet                                               | 0555-9026-58 |
| JUNEL FE 1/20 (norethindrone acetate and ethinyl estradiol, and ferrous fumarate) kit                           | 0555-9027-42 |
| JUNEL FE 1.5/30 (norethindrone acetate and ethinyl estradiol, and ferrous fumarate) kit                         | 0555-9028-58 |
| LARIN 1.5/30 (norethindrone acetate/ethinyl estradiol) kit                                                      | 16714-407-01 |
| LARIN 1/20 (norethindrone acetate/ethinyl estradiol) kit                                                        | 16714-408-01 |
| LARIN 24 FE (norethindrone acetate/ethinyl estradiol and ferrous fumarate) kit                                  | 16714-416-01 |
| LARIN FE 1.5/30 (norethindrone acetate/ethinyl estradiol and ferrous fumarate) kit                              | 16714-405-01 |
| LARIN FE 1/20 (norethindrone acetate/ethinyl estradiol and ferrous fumarate) kit                                | 16714-406-01 |
| LO MINASTRIN FE (norethindrone acetate and ethinyl estradiol, ethinyl estradiol and ferrous fumarate) kit       | 0430-0537-14 |
| LOMEDIA 24 FE (norethindrone acetate and ethinyl estradiol) kit                                                 | 65162-316-58 |
| MICROGESTIN (norethindrone acetate and ethinyl estradiol) tablet / kit                                          | 52544-233-28 |
| MINASTRIN 24 FE (norethindrone acetate and ethinyl estradiol chewable tablets and ferrous fumarate tablets) kit | 0430-0540-50 |
| TILIA FE (norethindrone acetate and ethinyl estradiol) kit                                                      | 52544-143-31 |
| TRI-LEGEST FE 28 DAY (norethindrone acetate and ethinyl estradiol) kit                                          | 0555-9032-70 |
| JINTELI (norethindrone acetate and ethinyl estradiol) tablet [Repackaged]                                       | 54868-6251-0 |
| JUNEL 1.5/30 (norethindrone acetate and ethinyl estradiol) tablet [Repackaged]                                  | 54868-5326-0 |
| JUNEL FE 1/20 (norethindrone acetate and ethinyl estradiol, and ferrous fumarate) kit [Repackaged]              | 54868-5935-0 |
| JUNEL FE 1.5/30 (norethindrone acetate and ethinyl estradiol, and ferrous fumarate) kit [Repackaged]            | 54868-6272-0 |
| JUNEL FE 1.5/30 (norethindrone acetate and ethinyl estradiol, and ferrous fumarate) kit [Repackaged]            | 42254-242-28 |
| MICROGESTIN FE (norethindrone acetate and ethinyl estradiol and ferrous fumarate) kit [Repackaged]              | 54868-4744-0 |
| MICROGESTIN (norethindrone acetate and ethinyl estradiol) tablet [Repackaged]                                   | 54868-6213-0 |
| TILIA FE (norethindrone acetate and ethinyl estradiol) kit [Repackaged]                                         | 54868-6274-0 |
| TILIA FE (norethindrone acetate and ethinyl estradiol) kit [Repackaged]                                         | 21695-685-28 |
| MONONESSA / TRINESSA (norgestimate and ethinyl estradiol) kit                                                   | 52544-247-28 |
| NORGESTIMATE AND ETHINYL ESTRADIOL ( norgestimate and ethinyl estradiol ) kit                                   | 0378-7277-53 |
| NORGESTIMATE AND ETHINYL ESTRADIOL (norgestimate and ethinyl estradiol) kit                                     | 68180-838-11 |
| NORGESTIMATE AND ETHINYL ESTRADIOL kit                                                                          | 68462-309-29 |
| NORGESTIMATE AND ETHINYL ESTRADIOL kit                                                                          | 68462-565-29 |
| NORGESTIMATE AND ETHINYL ESTRADIOL kit                                                                          | 68462-719-29 |
| ORTHO TRI CYCLEN LO (norgestimate and ethinyl estradiol) kit                                                    | 50458-251-00 |

|                                                                        |              |
|------------------------------------------------------------------------|--------------|
| PREFEST- estradiol/norgestimate                                        | 51285-063-90 |
| TRI-LO-SPRINTEC (norgestimate and ethinyl estradiol) kit               | 0093-2140-28 |
| TRINESSA (norgestimate and ethinyl estradiol) kit                      | 52544-248-28 |
| TRINESSA LO (norgestimate and ethinyl estradiol) kit                   | 52544-087-28 |
| MONONESSA (norgestimate and ethinyl estradiol) kit                     | 63187-054-28 |
| ORTHO TRI CYCLEN LO (norgestimate and ethinyl estradiol) kit           | 54868-4730-0 |
| TRINESSA (norgestimate and ethinyl estradiol) kit                      | 54868-5826-0 |
| ESTARYLLA (norgestimate and ethinyl estradiol) kit                     | 0781-4058-15 |
| FEMYNOR (norgestimate and ethinyl estradiol) kit                       | 69238-1551-6 |
| MILI (norgestimate and ethinyl estradiol) kit                          | 65862-776-28 |
| MONO-LINYAH (norgestimate and ethinyl estradiol) kit                   | 16714-360-01 |
| ORTHO TRI CYCLEN (norgestimate and ethinyl estradiol) kit              | 50458-191-00 |
| PREVIFEM / TRI-PREVIFEM (norgestimate and ethinyl estradiol) kit       | 0603-7642-01 |
| SPRINTEC (norgestimate and ethinyl estradiol) kit                      | 0555-9016-58 |
| TRI-ESTARYLLA (norgestimate and ethinyl estradiol) kit                 | 0781-4060-15 |
| TRI-LINYAH (norgestimate and ethinyl estradiol) kit                    | 16714-363-01 |
| TRI-LO- ESTARYLLA (norgestimate and ethinyl estradiol) kit             | 0781-4062-15 |
| TRI-LO-MARZIA ( norgestimate and ethinyl estradiol ) kit               | 57297-837-11 |
| TRI-LO-MARZIA ( norgestimate and ethinyl estradiol ) kit               | 68180-837-11 |
| TRI-MILI (norgestimate and ethinyl estradiol) kit                      | 65862-777-28 |
| TRI-SPRINTEC (norgestimate and ethinyl estradiol) kit                  | 0555-9018-58 |
| ORTHO TRI CYCLEN (norgestimate and ethinyl estradiol) kit [Repackaged] | 54868-4093-0 |
| PREVIFEM (norgestimate and ethinyl estradiol) kit [Repackaged]         | 76413-121-28 |
| SPRINTEC (norgestimate and ethinyl estradiol) kit [Repackaged]         | 21695-769-28 |
| TRI-SPRINTEC (norgestimate and ethinyl estradiol) kit [Repackaged]     | 76413-128-28 |
| TRI-SPRINTEC (norgestimate and ethinyl estradiol) kit [Repackaged]     | 66116-436-28 |
| TRI-SPRINTEC (norgestimate and ethinyl estradiol) kit [Repackaged]     | 54868-5028-0 |
| TRI-SPRINTEC (norgestimate and ethinyl estradiol) kit [Repackaged]     | 63187-458-28 |
| TRI-SPRINTEC (norgestimate and ethinyl estradiol) kit [Repackaged]     | 21695-770-01 |
| TRINESSA (norgestimate and ethinyl estradiol) kit [Repackaged]         | 21695-407-01 |
| ESTRADERM- estradiol patch, extended release [Repackaged]              | 0083-2310-08 |
| ESTRING (estradiol) ring                                               | 0013-2150-36 |
| ESTRING (estradiol) ring                                               | 63539-021-01 |
| ESTROGEL (estradiol) gel, metered                                      | 17139-613-50 |

|                                                                    |              |
|--------------------------------------------------------------------|--------------|
| ESTROGEL (estradiol) gel, metered                                  | 17139-617-20 |
| ESTERIFIED ESTROGENS AND METHYLTESTOSTERONE tablet                 | 53746-077-01 |
| ESTERIFIED ESTROGENS AND METHYLTESTOSTERONE tablet                 | 62559-149-01 |
| ESTERIFIED ESTROGENS AND METHYLTESTOSTERONE tablet, film coated    | 13925-171-01 |
| ESTERIFIED ESTROGENS AND METHYLTESTOSTERONE tablet, film coated    | 50220-001-01 |
| ESTROGEN (folliculinum, oophorinum) liquid                         | 57520-0860-1 |
| ESTROGEN (folliculinum, oophorinum) liquid                         | 43857-0074-1 |
| ESTROGEN (folliculinum, oophorinum) liquid                         | 43857-0150-1 |
| ESTROGEN (folliculinum, oophorinum) liquid                         | 57520-0094-1 |
| ESTROGEN (folliculinum, oophorinum) liquid                         | 43742-0066-1 |
| EEMT (estrogens, esterified and methyltestosterone) tablet, coated | 15310-010-01 |
| MENEST (esterified estrogens) tablet, film coated                  | 61570-072-01 |
| MENEST (estrogens, esterified) tablet [Repackaged]                 | 54868-5934-0 |
| ESTRASORB                                                          | 29336-325-56 |
| ESTRASORB                                                          | 99207-190-56 |
| EVAMIST (estradiol) spray                                          | 0574-2067-00 |
| EVAMIST (estradiol) spray, metered                                 | 64011-215-41 |
| EVAMIST (estradiol) spray, metered [Repackaged]                    | 54868-6157-0 |
| FLUTAMIDE capsule                                                  | 0172-4960-58 |
| FLUTAMIDE capsule                                                  | 49884-753-05 |
| FLUTAMIDE capsule                                                  | 0591-2466-18 |
| FLUTAMIDE capsule                                                  | 60429-272-05 |
| FINASTERIDE tablet                                                 | 69097-112-02 |
| FINASTERIDE tablet                                                 | 55111-172-01 |
| FINASTERIDE tablet                                                 | 65977-5025-0 |
| FINASTERIDE tablet, film coated                                    | 16729-090-01 |
| FINASTERIDE tablet, film coated                                    | 16729-089-10 |
| FINASTERIDE tablet, film coated                                    | 45963-600-03 |
| FINASTERIDE tablet, film coated                                    | 45963-500-02 |
| FINASTERIDE tablet, film coated                                    | 65862-686-30 |
| FINASTERIDE tablet, film coated                                    | 65862-149-01 |
| FINASTERIDE tablet, film coated                                    | 31722-525-01 |
| FINASTERIDE tablet, film coated                                    | 31722-525-01 |
| FINASTERIDE tablet, film coated                                    | 31722-526-10 |



|                                                            |              |
|------------------------------------------------------------|--------------|
| FINASTERIDE tablet, film coated                            | 57237-062-05 |
| FINASTERIDE tablet, film coated                            | 57237-061-30 |
| FINASTERIDE tablet, film coated                            | 55111-171-05 |
| FINASTERIDE tablet, film coated                            | 76282-412-05 |
| FINASTERIDE tablet, film coated                            | 68554-3025-0 |
| FINASTERIDE tablet, film coated                            | 68554-3026-0 |
| FINASTERIDE tablet, film coated                            | 50742-123-30 |
| FINASTERIDE tablet, film coated                            | 63739-495-40 |
| FINASTERIDE tablet, film coated                            | 51079-321-01 |
| FINASTERIDE tablet, film coated                            | 51079-520-01 |
| FINASTERIDE tablet, film coated                            | 0378-5036-01 |
| FINASTERIDE tablet, film coated                            | 58517-200-30 |
| FINASTERIDE tablet, film coated                            | 16714-522-10 |
| FINASTERIDE tablet, film coated                            | 0603-3633-02 |
| FINASTERIDE tablet, film coated                            | 47335-715-08 |
| FINASTERIDE tablet, film coated                            | 47335-714-08 |
| FINASTERIDE tablet, film coated                            | 0093-7355-05 |
| FINASTERIDE (finasteride) tablet, film coated [Repackaged] | 42291-280-50 |
| FINASTERIDE tablet [Repackaged]                            | 33261-833-90 |
| FINASTERIDE tablet [Repackaged]                            | 43598-303-30 |
| FINASTERIDE tablet [Repackaged]                            | 0179-0175-88 |
| FINASTERIDE tablet [Repackaged]                            | 68788-9519-3 |
| FINASTERIDE tablet [Repackaged]                            | 52125-403-02 |
| FINASTERIDE tablet, film coated [Repackaged]               | 54569-6048-0 |
| FINASTERIDE tablet, film coated [Repackaged]               | 68084-919-11 |
| FINASTERIDE tablet, film coated [Repackaged]               | 68084-399-01 |
| FINASTERIDE tablet, film coated [Repackaged]               | 17856-0090-1 |
| FINASTERIDE tablet, film coated [Repackaged]               | 69189-0090-1 |
| FINASTERIDE tablet, film coated [Repackaged]               | 50268-323-11 |
| FINASTERIDE tablet, film coated [Repackaged]               | 63629-5220-1 |
| FINASTERIDE tablet, film coated [Repackaged]               | 63629-1585-1 |
| FINASTERIDE tablet, film coated [Repackaged]               | 55154-5685-0 |
| FINASTERIDE tablet, film coated [Repackaged]               | 58118-7355-0 |
| FINASTERIDE tablet, film coated [Repackaged]               | 43598-390-30 |

|                                                                  |              |
|------------------------------------------------------------------|--------------|
| FINASTERIDE tablet, film coated [Repackaged]                     | 68645-446-70 |
| FINASTERIDE tablet, film coated [Repackaged]                     | 54868-5636-0 |
| FINASTERIDE tablet, film coated [Repackaged]                     | 68788-9517-1 |
| FINASTERIDE tablet, film coated [Repackaged]                     | 68788-9249-3 |
| FINASTERIDE tablet, film coated [Repackaged]                     | 63187-265-30 |
| FINASTERIDE tablet, film coated [Repackaged]                     | 61786-340-19 |
| FINASTERIDE tablet, film coated [Repackaged]                     | 61786-329-19 |
| FINASTERIDE tablet, film coated [Repackaged]                     | 61786-230-19 |
| FINASTERIDE tablet, film coated [Repackaged]                     | 61786-302-19 |
| FINASTERIDE tablet, film coated [Repackaged]                     | 61786-302-02 |
| FINASTERIDE tablet, film coated [Repackaged]                     | 50436-0446-1 |
| LUPRON (leuprolide acetate) injection, solution                  | 0300-3612-24 |
| LUPRON DEPOT (leuprolide acetate) kit                            | 0074-3641-03 |
| LUPRON DEPOT (leuprolide acetate) kit                            | 0074-3663-03 |
| LUPRON DEPOT (leuprolide acetate) kit                            | 0074-3346-03 |
| LUPRON DEPOT-PED (leuprolide acetate) kit                        | 0074-2108-03 |
| LUPRON DEPOT-PED (leuprolide acetate) kit [Repackaged]           | 52125-736-01 |
| LUPANETA PACK (leuprolide acetate and norethindrone acetate) kit | 0074-1053-05 |
| LUPANETA PACK (leuprolide acetate and norethindrone acetate) kit | 0074-1052-05 |
| MEDROXYPROGESTERONE ACETATE injection, suspension                | 59762-4537-1 |
| MEDROXYPROGESTERONE ACETATE injection, suspension                | 0703-6801-01 |
| MEDROXYPROGESTERONE ACETATE tablet                               | 0555-0779-02 |
| MEDROXYPROGESTERONE ACETATE tablet                               | 59762-3740-1 |
| MEDROXYPROGESTERONE ACETATE tablet [Repackaged]                  | 55289-908-30 |
| MEDROXYPROGESTERONE ACETATE tablet [Repackaged]                  | 43063-438-05 |
| MEDROXYPROGESTERONE ACETATE injection, suspension [Repackaged]   | 54569-5616-0 |
| MEDROXYPROGESTERONE ACETATE injection, suspension [Repackaged]   | 54868-5257-0 |
| MEDROXYPROGESTERONE ACETATE injection, suspension [Repackaged]   | 68788-9233-1 |
| MEDROXYPROGESTERONE ACETATE injection, suspension [Repackaged]   | 52125-640-01 |
| MEDROXYPROGESTERONE ACETATE injection, suspension [Repackaged]   | 52125-915-01 |
| MEDROXYPROGESTERONE ACETATE tablet [Repackaged]                  | 54569-0809-0 |
| MEDROXYPROGESTERONE ACETATE tablet [Repackaged]                  | 54569-3806-2 |
| MEDROXYPROGESTERONE ACETATE tablet [Repackaged]                  | 33261-534-05 |
| MEDROXYPROGESTERONE ACETATE tablet [Repackaged]                  | 60687-105-11 |

|                                                                                                     |              |
|-----------------------------------------------------------------------------------------------------|--------------|
| MEDROXYPROGESTERONE ACETATE tablet [Repackaged]                                                     | 69189-3741-1 |
| MEDROXYPROGESTERONE ACETATE tablet [Repackaged]                                                     | 10544-001-30 |
| MEDROXYPROGESTERONE ACETATE tablet [Repackaged]                                                     | 63629-2613-1 |
| MEDROXYPROGESTERONE ACETATE tablet [Repackaged]                                                     | 63629-2614-1 |
| MEDROXYPROGESTERONE ACETATE tablet [Repackaged]                                                     | 63629-2612-1 |
| MEDROXYPROGESTERONE ACETATE tablet [Repackaged]                                                     | 55154-0533-0 |
| MEDROXYPROGESTERONE ACETATE tablet [Repackaged]                                                     | 66336-603-20 |
| MEDROXYPROGESTERONE ACETATE tablet [Repackaged]                                                     | 55289-160-05 |
| MEDROXYPROGESTERONE ACETATE tablet [Repackaged]                                                     | 55289-816-30 |
| MEDROXYPROGESTERONE ACETATE tablet [Repackaged]                                                     | 54868-0109-0 |
| MEDROXYPROGESTERONE ACETATE tablet [Repackaged]                                                     | 68788-9899-1 |
| MEDROXYPROGESTERONE ACETATE tablet [Repackaged]                                                     | 64205-077-10 |
| MEDROXYPROGESTERONE ACETATE tablet [Repackaged]                                                     | 21695-896-10 |
| MEDROXYPROGESTERONE ACETATE tablet [Repackaged]                                                     | 52125-803-08 |
| MEDROXYPROGESTERONE ACETATE tablet [Repackaged]                                                     | 49349-287-02 |
| MEDROXYPROGESTERONE ACETATE tablet [Repackaged]                                                     | 52125-562-08 |
| MEDROXYPROGESTERONE ACETATE tablet [Repackaged]                                                     | 49349-287-08 |
| PREMARIN (conjugated estrogens) injection, powder, lyophilized, for solution                        | 0046-0749-05 |
| PREMARIN (estrogens, conjugated) tablet, film coated                                                | 0046-1100-51 |
| PREMARIN VAGINAL (conjugated estrogens) cream                                                       | 0046-0872-04 |
| PREMARIN (conjugated estrogens) tablet, film coated [Repackaged]                                    | 43353-687-60 |
| PREMARIN (conjugated estrogens) tablet, film coated [Repackaged]                                    | 55154-0216-0 |
| PREMARIN (conjugated estrogens) tablet, film coated [Repackaged]                                    | 35356-249-00 |
| PREMARIN (conjugated estrogens) tablet, film coated [Repackaged]                                    | 49999-109-00 |
| PREMARIN (conjugated estrogens) tablet, film coated [Repackaged]                                    | 54868-0365-0 |
| PREMARIN (conjugated estrogens) tablet, film coated [Repackaged]                                    | 53808-0770-1 |
| PREMARIN (conjugated estrogens) tablet, film coated [Repackaged]                                    | 54569-0812-0 |
| PREMARIN (conjugated estrogens) tablet, film coated [Repackaged]                                    | 54569-0811-3 |
| PREMARIN (conjugated estrogens) tablet, film coated [Repackaged]                                    | 69189-1105-1 |
| PREMPHASE (conjugated estrogens and medroxyprogesterone acetate) kit, tablet, sugar coated          | 0046-1105-11 |
| PREMPHASE (conjugated estrogens and medroxyprogesterone acetate) kit [Repackaged]                   | 54868-3800-0 |
| PREMPRO (conjugated estrogens and medroxyprogesterone acetate) tablet, sugar coated<br>[Repackaged] | 68258-5978-2 |
| PREMPRO (conjugated estrogens and medroxyprogesterone acetate) tablet, sugar coated                 | 54868-3799-0 |

|                                                         |              |
|---------------------------------------------------------|--------------|
| [Repackaged]                                            |              |
| CRINONE (progesterone) gel                              | 55056-0806-2 |
| NATURAL PROGESTERONE (progesterone) spray               | 57520-0318-1 |
| NATURAL PROGESTERONE (progesterone) spray               | 43857-0084-1 |
| PROCHIEVE (progesterone) gel                            | 55056-0406-1 |
| PROGESTERONE (progesterone) liquid                      | 55714-6634-1 |
| PROGESTERONE (progesterone,) liquid                     | 57520-0301-1 |
| PROGESTERONE capsule                                    | 17478-766-10 |
| PROGESTERONE capsule                                    | 42291-690-01 |
| PROGESTERONE capsule                                    | 69387-101-01 |
| PROGESTERONE capsule                                    | 10888-7135-2 |
| PROGESTERONE capsule                                    | 11014-0189-1 |
| PROGESTERONE capsule                                    | 0093-5353-01 |
| PROGESTERONE capsule                                    | 0591-3964-01 |
| PROGESTERONE injection                                  | 0143-9725-01 |
| PROGESTERONE injection, solution                        | 0591-3128-79 |
| PROGESTERONE injection, solution                        | 0517-0750-01 |
| PROGESTERONE injection, solution                        | 63323-261-10 |
| PROGESTERONE liquid                                     | 43857-0120-1 |
| PROGESTERONE liquid                                     | 43857-0103-1 |
| PROGESTERONE liquid                                     | 43742-0762-1 |
| PROGESTERONE liquid                                     | 43742-0158-1 |
| PROGESTERONE capsule [Repackaged]                       | 60429-281-01 |
| PROGESTERONE capsule [Repackaged]                       | 43063-649-30 |
| X (progesterone) powder                                 | 62157-217-01 |
| PROPECIA (finasteride) tablet, film coated              | 0006-0071-07 |
| PROPECIA (finasteride) tablet, film coated [Repackaged] | 63629-1603-1 |
| PROPECIA (finasteride) tablet, film coated [Repackaged] | 54868-4120-0 |
| PROSCAR- finasteride tablet, film coated                | 0006-0072-31 |
| PROMETRIUM (progesterone) capsule                       | 0032-1708-01 |
| PROMETRIUM (progesterone) capsule [Repackaged]          | 69189-1708-1 |
| PROMETRIUM (progesterone) capsule [Repackaged]          | 63629-2770-1 |
| PROMETRIUM (progesterone) capsule [Repackaged]          | 63629-2767-1 |
| PROMETRIUM (progesterone) capsule [Repackaged]          | 54868-4230-0 |

|                                                     |              |
|-----------------------------------------------------|--------------|
| PROVERA (medroxyprogesterone acetate) tablet        | 0009-0050-02 |
| SPIRONOLACTONE (spironolactone) tablet, film coated | 59746-216-01 |
| SPIRONOLACTONE tablet                               | 53489-143-01 |
| SPIRONOLACTONE tablet                               | 65162-511-03 |
| SPIRONOLACTONE tablet                               | 53746-511-01 |
| SPIRONOLACTONE tablet                               | 0904-5951-61 |
| SPIRONOLACTONE tablet, film coated                  | 53489-328-01 |
| SPIRONOLACTONE tablet, film coated                  | 0228-2672-11 |
| SPIRONOLACTONE tablet, film coated                  | 59762-5011-1 |
| SPIRONOLACTONE tablet, film coated                  | 0378-0243-01 |
| SPIRONOLACTONE tablet, film coated                  | 0603-5763-21 |
| SPIRONOLACTONE tablet, film coated                  | 0781-1599-01 |
| SPIRONOLACTONE (spironolactone) tablet [Repackaged] | 50268-726-11 |
| SPIRONOLACTONE tablet [Repackaged]                  | 50090-0136-0 |
| SPIRONOLACTONE tablet [Repackaged]                  | 69189-0511-1 |
| SPIRONOLACTONE tablet [Repackaged]                  | 10544-499-90 |
| SPIRONOLACTONE tablet [Repackaged]                  | 10544-523-30 |
| SPIRONOLACTONE tablet [Repackaged]                  | 63629-1830-1 |
| SPIRONOLACTONE tablet [Repackaged]                  | 55154-1495-0 |
| SPIRONOLACTONE tablet [Repackaged]                  | 63739-544-04 |
| SPIRONOLACTONE tablet [Repackaged]                  | 63739-416-10 |
| SPIRONOLACTONE tablet [Repackaged]                  | 43063-072-01 |
| SPIRONOLACTONE tablet [Repackaged]                  | 68788-9729-3 |
| SPIRONOLACTONE tablet [Repackaged]                  | 68788-9124-3 |
| SPIRONOLACTONE tablet [Repackaged]                  | 21695-766-30 |
| SPIRONOLACTONE tablet [Repackaged]                  | 52125-978-02 |
| SPIRONOLACTONE tablet [Repackaged]                  | 49349-563-28 |
| SPIRONOLACTONE tablet [Repackaged]                  | 52125-603-02 |
| SPIRONOLACTONE tablet [Repackaged]                  | 49349-680-02 |
| SPIRONOLACTONE tablet [Repackaged]                  | 52125-584-02 |
| SPIRONOLACTONE tablet [Repackaged]                  | 49349-563-02 |
| SPIRONOLACTONE tablet [Repackaged]                  | 52125-866-02 |
| SPIRONOLACTONE tablet [Repackaged]                  | 60760-981-30 |
| SPIRONOLACTONE tablet [Repackaged]                  | 53808-0979-1 |

|                                                            |              |
|------------------------------------------------------------|--------------|
| SPIRONOLACTONE tablet [Repackaged]                         | 53808-0796-1 |
| SPIRONOLACTONE tablet [Repackaged]                         | 50436-9973-1 |
| SPIRONOLACTONE tablet, film coated [Repackaged]            | 54569-0505-0 |
| SPIRONOLACTONE tablet, film coated [Repackaged]            | 33261-764-30 |
| SPIRONOLACTONE tablet, film coated [Repackaged]            | 68084-206-01 |
| SPIRONOLACTONE tablet, film coated [Repackaged]            | 63629-4094-1 |
| SPIRONOLACTONE tablet, film coated [Repackaged]            | 63629-5341-1 |
| SPIRONOLACTONE tablet, film coated [Repackaged]            | 55154-5055-0 |
| SPIRONOLACTONE tablet, film coated [Repackaged]            | 68151-2776-1 |
| SPIRONOLACTONE tablet, film coated [Repackaged]            | 66336-916-30 |
| SPIRONOLACTONE tablet, film coated [Repackaged]            | 35356-419-00 |
| SPIRONOLACTONE tablet, film coated [Repackaged]            | 55700-305-30 |
| SPIRONOLACTONE tablet, film coated [Repackaged]            | 35356-969-30 |
| SPIRONOLACTONE tablet, film coated [Repackaged]            | 76237-246-30 |
| SPIRONOLACTONE tablet, film coated [Repackaged]            | 51079-103-01 |
| SPIRONOLACTONE tablet, film coated [Repackaged]            | 0615-1535-05 |
| SPIRONOLACTONE tablet, film coated [Repackaged]            | 0615-8031-05 |
| SPIRONOLACTONE tablet, film coated [Repackaged]            | 51655-838-52 |
| SPIRONOLACTONE tablet, film coated [Repackaged]            | 55289-507-01 |
| SPIRONOLACTONE tablet, film coated [Repackaged]            | 43063-277-30 |
| SPIRONOLACTONE tablet, film coated [Repackaged]            | 54868-0700-0 |
| SPIRONOLACTONE tablet, film coated [Repackaged]            | 68788-9227-3 |
| SPIRONOLACTONE tablet, film coated [Repackaged]            | 63187-634-30 |
| SPIRONOLACTONE tablet, film coated [Repackaged]            | 42254-183-30 |
| SPIRONOLACTONE tablet, film coated [Repackaged]            | 21695-960-60 |
| SPIRONOLACTONE tablet, film coated [Repackaged]            | 52125-418-02 |
| SPIRONOLACTONE tablet, film coated [Repackaged]            | 53808-0338-1 |
| SPIRONOLACTONE tablet, film coated [Repackaged]            | 50436-5015-0 |
| SPIRONOLACTONE tablet, film coated [Repackaged]            | 50436-4477-2 |
| SPIRONOLACTONE AND HYDROCHLOROTHIAZIDE tablet              | 53489-144-01 |
| SPIRONOLACTONE AND HYDROCHLOROTHIAZIDE tablet              | 0378-0141-01 |
| SPIRONOLACTONE AND HYDROCHLOROTHIAZIDE tablet, film coated | 59762-5014-1 |
| SPIRONOLACTONE AND HYDROCHLOROTHIAZIDE tablet [Repackaged] | 68084-946-11 |
| SPIRONOLACTONE AND HYDROCHLOROTHIAZIDE tablet [Repackaged] | 51079-104-01 |

|                                                                                                  |              |
|--------------------------------------------------------------------------------------------------|--------------|
| SPIRONOLACTONE AND HYDROCHLOROTHIAZIDE tablet [Repackaged]                                       | 54868-0699-1 |
| SPIRONOLACTONE AND HYDROCHLOROTHIAZIDE tablet, film coated [Repackaged]                          | 54569-0502-0 |
| FINASTERIDE tablet, film coated                                                                  | 76282-412-10 |
| ESTRADIOL pellet                                                                                 | 69761-025-12 |
| ESTRADIOL pellet                                                                                 | 69761-022-12 |
| ESTRADIOL pellet                                                                                 | 69761-020-12 |
| ESTRADIOL pellet                                                                                 | 69761-018-12 |
| ESTRADIOL pellet                                                                                 | 69761-015-12 |
| ESTRADIOL pellet                                                                                 | 69761-012-12 |
| ESTRADIOL pellet                                                                                 | 69761-010-12 |
| ESTRADIOL pellet                                                                                 | 69761-006-12 |
| PROGESTERONE capsule                                                                             | 69387-102-01 |
| SPIRONOLACTONE tablet [Repackaged]                                                               | 69189-0511-5 |
| FINASTERIDE tablet                                                                               | 69097-112-05 |
| ESTRADIOL tablet [Repackaged]                                                                    | 68788-9901-3 |
| MEDROXYPROGESTERONE ACETATE tablet [Repackaged]                                                  | 68788-9899-3 |
| SPIRONOLACTONE tablet [Repackaged]                                                               | 68788-9729-6 |
| FINASTERIDE tablet [Repackaged]                                                                  | 68788-9519-6 |
| FINASTERIDE tablet, film coated [Repackaged]                                                     | 68788-9517-3 |
| ESTRADIOL tablet [Repackaged]                                                                    | 68788-9416-3 |
| FINASTERIDE tablet, film coated [Repackaged]                                                     | 68788-9249-6 |
| SPIRONOLACTONE tablet, film coated [Repackaged]                                                  | 68788-9227-6 |
| SPIRONOLACTONE tablet [Repackaged]                                                               | 68788-9124-6 |
| FINASTERIDE tablet, film coated                                                                  | 68554-3026-1 |
| FINASTERIDE tablet, film coated                                                                  | 68554-3025-1 |
| NORGESTIMATE AND ETHINYL ESTRADIOL kit                                                           | 68462-719-84 |
| NORETHINDRONE ACETATE AND ETHINYL ESTRADIOL tablet                                               | 68462-656-90 |
| NORGESTIMATE AND ETHINYL ESTRADIOL kit                                                           | 68462-309-84 |
| NORETHINDRONE ACETATE AND ETHINYL ESTRADIOL tablet                                               | 68462-132-81 |
| BICALUTAMIDE tablet, film coated                                                                 | 68382-224-05 |
| PREMPRO (conjugated estrogens and medroxyprogesterone acetate) tablet, sugar coated [Repackaged] | 68258-5980-2 |
| BLISOVI FE 1.5/30 (norethindrone acetate and ethinyl estradiol) kit                              | 68180-866-13 |
| BLISOVI FE 1/20 (norethindrone acetate and ethinyl estradiol) kit                                | 68180-865-13 |

|                                                                             |              |
|-----------------------------------------------------------------------------|--------------|
| BLISOVI 24 FE (norethindrone acetate and ethinyl estradiol) kit             | 68180-864-13 |
| NORGESTIMATE AND ETHINYL ESTRADIOL (norgestimate and ethinyl estradiol) kit | 68180-838-13 |
| TRI-LO-MARZIA ( norgestimate and ethinyl estradiol ) kit                    | 68180-837-13 |
| FYAVOLV (norethindrone acetate and ethinyl estradiol) tablet, film coated   | 68180-827-11 |
| SPIRONOLACTONE AND HYDROCHLOROTHIAZIDE tablet [Repackaged]                  | 68084-946-21 |
| FINASTERIDE tablet, film coated [Repackaged]                                | 68084-919-21 |
| BICALUTAMIDE tablet [Repackaged]                                            | 68084-612-21 |
| FINASTERIDE tablet, film coated [Repackaged]                                | 68084-399-11 |
| SPIRONOLACTONE tablet, film coated [Repackaged]                             | 68084-206-11 |
| DIVIGEL (estradiol) gel                                                     | 68025-065-07 |
| DIVIGEL (estradiol) gel                                                     | 68025-065-07 |
| BICALUTAMIDE tablet, film coated                                            | 67253-191-10 |
| SPIRONOLACTONE tablet, film coated [Repackaged]                             | 66336-916-60 |
| FINASTERIDE tablet                                                          | 65977-5025-1 |
| TRI-MILI (norgestimate and ethinyl estradiol) kit                           | 65862-777-85 |
| MILI (norgestimate and ethinyl estradiol) kit                               | 65862-776-85 |
| FINASTERIDE tablet, film coated                                             | 65862-686-90 |
| FINASTERIDE tablet, film coated                                             | 65862-149-05 |
| BICALUTAMIDE tablet, film coated                                            | 65841-613-05 |
| DUTASTERIDE capsule                                                         | 65162-750-09 |
| SPIRONOLACTONE tablet                                                       | 65162-511-06 |
| LOMEDIA 24 FE (norethindrone acetate and ethinyl estradiol) kit             | 65162-316-84 |
| ESTRADIOL tablet                                                            | 65162-226-23 |
| DUTASTERIDE capsule, liquid filled                                          | 64980-224-09 |
| DUTASTERIDE capsule, liquid filled                                          | 64380-763-05 |
| MEDROXYPROGESTERONE ACETATE tablet [Repackaged]                             | 64205-087-30 |
| ESTRADIOL tablet [Repackaged]                                               | 64205-048-90 |
| EVAMIST (estradiol) spray, metered                                          | 64011-215-42 |
| SPIRONOLACTONE tablet [Repackaged]                                          | 63739-544-10 |
| FINASTERIDE tablet, film coated                                             | 63739-495-41 |
| BICALUTAMIDE tablet [Repackaged]                                            | 63629-5321-2 |
| FINASTERIDE tablet, film coated [Repackaged]                                | 63629-5220-2 |
| ESTRADIOL tablet [Repackaged]                                               | 63629-5208-2 |
| ESTRADIOL tablet [Repackaged]                                               | 63629-4788-2 |



|                                                          |              |
|----------------------------------------------------------|--------------|
| ESTRADIOL tablet [Repackaged]                            | 63629-3755-2 |
| MEDROXYPROGESTERONE ACETATE tablet [Repackaged]          | 63629-2613-2 |
| MEDROXYPROGESTERONE ACETATE tablet [Repackaged]          | 63629-2612-2 |
| SPIRONOLACTONE tablet [Repackaged]                       | 63629-1830-2 |
| FINASTERIDE tablet, film coated [Repackaged]             | 63629-1585-2 |
| DUTASTERIDE capsule [Repackaged]                         | 63187-657-60 |
| SPIRONOLACTONE tablet, film coated [Repackaged]          | 63187-634-60 |
| ESTRADIOL tablet [Repackaged]                            | 63187-482-60 |
| ESTERIFIED ESTROGENS AND METHYLTESTOSTERONE tablet       | 62559-150-01 |
| DUTASTERIDE capsule, liquid filled                       | 62112-8068-2 |
| MENEST (esterified estrogens) tablet, film coated        | 61570-073-01 |
| SPIRONOLACTONE tablet [Repackaged]                       | 60760-981-90 |
| MEDROXYPROGESTERONE ACETATE tablet [Repackaged]          | 60687-105-21 |
| DUTASTERIDE capsule, liquid filled                       | 60505-3877-9 |
| BICALUTAMIDE tablet                                      | 60505-2642-3 |
| ESTRADIOL tablet [Repackaged]                            | 60429-328-01 |
| PROGESTERONE capsule [Repackaged]                        | 60429-282-01 |
| FLUTAMIDE capsule                                        | 60429-272-18 |
| BICALUTAMIDE tablet, film coated [Repackaged]            | 60429-226-30 |
| BICALUTAMIDE tablet, film coated [Repackaged]            | 60429-177-05 |
| SPIRONOLACTONE tablet, film coated                       | 59762-5011-2 |
| MEDROXYPROGESTERONE ACETATE injection, suspension        | 59762-4537-2 |
| MEDROXYPROGESTERONE ACETATE tablet                       | 59762-3740-5 |
| SPIRONOLACTONE (spironolactone) tablet, film coated      | 59746-216-05 |
| NILANDRON (nilutamide) tablet                            | 59212-111-14 |
| FINASTERIDE tablet, film coated [Repackaged]             | 58118-7355-3 |
| TRI-LO-MARZIA ( norgestimate and ethinyl estradiol ) kit | 57297-837-13 |
| FINASTERIDE tablet, film coated                          | 57237-062-30 |
| FINASTERIDE tablet, film coated                          | 57237-061-90 |
| MEDROXYPROGESTERONE ACETATE tablet [Repackaged]          | 55289-908-42 |
| ESTRADIOL tablet [Repackaged]                            | 55289-761-30 |
| ESTRADIOL tablet [Repackaged]                            | 55289-603-21 |
| SPIRONOLACTONE tablet, film coated [Repackaged]          | 55289-507-30 |
| MEDROXYPROGESTERONE ACETATE tablet [Repackaged]          | 55289-160-07 |

|                                                                                                  |              |
|--------------------------------------------------------------------------------------------------|--------------|
| ESTRADIOL tablet [Repackaged]                                                                    | 55154-6242-4 |
| SPIRONOLACTONE tablet, film coated [Repackaged]                                                  | 55154-5065-0 |
| MEDROXYPROGESTERONE ACETATE tablet [Repackaged]                                                  | 55154-0533-4 |
| PREMARIN (conjugated estrogens) tablet, film coated [Repackaged]                                 | 55154-0216-4 |
| FINASTERIDE tablet                                                                               | 55111-172-05 |
| FINASTERIDE tablet, film coated                                                                  | 55111-171-18 |
| PROCHIEVE (progesterone) gel                                                                     | 55056-1601-5 |
| CRINONE (progesterone) gel                                                                       | 55056-0808-6 |
| ENJUVA (synthetic conjugated estrogens, b) tablet [Repackaged]                                   | 54868-6163-1 |
| MENEST (estrogens, esterified) tablet [Repackaged]                                               | 54868-5934-1 |
| FINASTERIDE tablet, film coated [Repackaged]                                                     | 54868-5636-1 |
| AVODART (dutasteride) capsule, liquid filled (Repackaged)                                        | 54868-5114-1 |
| PREMPRO (conjugated estrogens and medroxyprogesterone acetate) tablet, sugar coated [Repackaged] | 54868-4866-0 |
| ESTRADIOL patch [Repackaged]                                                                     | 54868-4813-0 |
| VIVELLE DOT - estradiol patch, extended release [Repackaged]                                     | 54868-4243-0 |
| PROMETRIUM (progesterone) capsule [Repackaged]                                                   | 54868-4230-1 |
| PROPECIA (finasteride) tablet, film coated [Repackaged]                                          | 54868-4120-1 |
| ESTRADIOL tablet [Repackaged]                                                                    | 54868-4030-1 |
| CENESTIN - synthetic conjugated estrogens, a tablet, film coated                                 | 54868-1432-1 |
| SPIRONOLACTONE tablet, film coated [Repackaged]                                                  | 54868-0700-1 |
| SPIRONOLACTONE AND HYDROCHLOROTHIAZIDE tablet [Repackaged]                                       | 54868-0699-2 |
| PREMARIN (conjugated estrogens) tablet, film coated [Repackaged]                                 | 54868-0365-2 |
| MEDROXYPROGESTERONE ACETATE tablet [Repackaged]                                                  | 54868-0109-1 |
| FINASTERIDE tablet, film coated [Repackaged]                                                     | 54569-6048-1 |
| ESTRADIOL tablet [Repackaged]                                                                    | 54569-4907-2 |
| PREMARIN (conjugated estrogens) tablet, film coated [Repackaged]                                 | 54569-0812-5 |
| MEDROXYPROGESTERONE ACETATE tablet [Repackaged]                                                  | 54569-0809-2 |
| SPIRONOLACTONE tablet, film coated [Repackaged]                                                  | 54569-0505-1 |
| SPIRONOLACTONE tablet, film coated [Repackaged]                                                  | 53808-0592-1 |
| SPIRONOLACTONE tablet                                                                            | 53746-511-05 |
| ESTERIFIED ESTROGENS AND METHYLTESTOSTERONE tablet                                               | 53746-078-01 |
| SPIRONOLACTONE tablet, film coated                                                               | 53489-328-02 |
| SPIRONOLACTONE AND HYDROCHLOROTHIAZIDE tablet                                                    | 53489-144-05 |

|                                                                                             |              |
|---------------------------------------------------------------------------------------------|--------------|
| SPIRONOLACTONE tablet                                                                       | 53489-143-05 |
| MICROGESTIN (norethindrone acetate and ethinyl estradiol) tablet / kit                      | 52544-249-28 |
| MONONESSA / TRINESSA (norgestimate and ethinyl estradiol) kit                               | 52544-248-28 |
| MICROGESTIN 24 FE (norethindrone acetate and ethinyl estradiol and ferrous fumarate) kit    | 52544-167-41 |
| TRINESSA LO (norgestimate and ethinyl estradiol) kit                                        | 52544-087-41 |
| DUTASTERIDE capsule                                                                         | 51991-749-90 |
| ESTRADIOL / NORETHINDRONE ACETATE (estradiol and norethindrone acetate) tablet, film coated | 51991-623-28 |
| ENJUVIA (synthetic conjugated estrogens, b) tablet, film coated                             | 51285-407-02 |
| FINASTERIDE tablet, film coated                                                             | 51079-520-20 |
| FINASTERIDE tablet, film coated                                                             | 51079-321-20 |
| SPIRONOLACTONE AND HYDROCHLOROTHIAZIDE tablet [Repackaged]                                  | 51079-104-20 |
| SPIRONOLACTONE tablet, film coated [Repackaged]                                             | 51079-103-17 |
| FINASTERIDE tablet, film coated                                                             | 50742-123-90 |
| ORTHO TRI CYCLEN LO (norgestimate and ethinyl estradiol) kit                                | 50458-251-12 |
| ORTHO TRI CYCLEN (norgestimate and ethinyl estradiol) kit                                   | 50458-191-12 |
| SPIRONOLACTONE tablet [Repackaged]                                                          | 50436-9973-3 |
| FINASTERIDE tablet, film coated [Repackaged]                                                | 50436-0446-3 |
| CLIMARA (estradiol) patch [Repackaged]                                                      | 50419-451-04 |
| SPIRONOLACTONE (spironolactone) tablet [Repackaged]                                         | 50268-726-15 |
| FINASTERIDE tablet, film coated [Repackaged]                                                | 50268-323-15 |
| ESTRADIOL (estradiol) tablet [Repackaged]                                                   | 50268-290-15 |
| ESTERIFIED ESTROGENS AND METHYLTESTOSTERONE tablet, film coated                             | 50220-002-01 |
| TARINA FE 1/20 (norethindrone acetate and ethinyl estradiol) kit                            | 50102-128-03 |
| SPIRONOLACTONE tablet [Repackaged]                                                          | 50090-0136-1 |
| PREMARIN (conjugated estrogens) tablet, film coated [Repackaged]                            | 49999-109-30 |
| FLUTAMIDE capsule                                                                           | 49884-753-13 |
| ESTRADIOL TRANSDERMAL SYSTEM (estradiol) patch                                              | 47781-205-04 |
| FINASTERIDE tablet, film coated                                                             | 47335-715-13 |
| FINASTERIDE tablet, film coated                                                             | 47335-714-18 |
| BICALUTAMIDE tablet, film coated                                                            | 47335-485-18 |
| FINASTERIDE tablet, film coated                                                             | 45963-600-09 |
| FINASTERIDE tablet, film coated                                                             | 45963-500-08 |
| FINASTERIDE tablet, film coated [Repackaged]                                                | 43598-390-90 |

|                                                                                |              |
|--------------------------------------------------------------------------------|--------------|
| FINASTERIDE tablet [Repackaged]                                                | 43598-303-90 |
| PREMARIN (conjugated estrogens) tablet, film coated [Repackaged]               | 43353-688-60 |
| ESTRADIOL tablet [Repackaged]                                                  | 43063-446-30 |
| MEDROXYPROGESTERONE ACETATE tablet [Repackaged]                                | 43063-438-07 |
| ESTRADIOL (estradiol) tablet [Repackaged]                                      | 43063-201-30 |
| SPIRONOLACTONE tablet [Repackaged]                                             | 43063-072-30 |
| PROGESTERONE capsule                                                           | 42291-691-01 |
| FINASTERIDE (finasteride) tablet, film coated [Repackaged]                     | 42291-280-90 |
| BICALUTAMIDE (bicalutamide) tablet, film coated [Repackaged]                   | 42291-168-50 |
| ESTRADIOL VALERATE injection                                                   | 42023-135-01 |
| DELESTROGEN- estradiol valerate injection                                      | 42023-111-01 |
| BICALUTAMIDE tablet                                                            | 41616-485-18 |
| SPIRONOLACTONE tablet, film coated [Repackaged]                                | 35356-969-60 |
| SPIRONOLACTONE tablet, film coated [Repackaged]                                | 35356-419-30 |
| PREMARIN (conjugated estrogens) tablet, film coated [Repackaged]               | 35356-250-00 |
| SPIRONOLACTONE tablet, film coated [Repackaged]                                | 33261-869-30 |
| ESTRADIOL tablet [Repackaged]                                                  | 33261-667-60 |
| MEDROXYPROGESTERONE ACETATE tablet [Repackaged]                                | 33261-534-10 |
| FINASTERIDE tablet, film coated                                                | 31722-526-30 |
| FINASTERIDE tablet, film coated                                                | 31722-525-05 |
| FINASTERIDE tablet, film coated                                                | 31722-525-05 |
| ESTRADIOL tablet                                                               | 23155-014-01 |
| MEDROXYPROGESTERONE ACETATE tablet [Repackaged]                                | 21695-896-20 |
| ESTRADIOL tablet [Repackaged]                                                  | 21695-613-30 |
| ELESTRIN (estradiol) gel                                                       | 18860-480-30 |
| PROGESTERONE capsule                                                           | 17478-767-10 |
| ESTROGEL (estradiol) gel, metered                                              | 17139-617-40 |
| FINASTERIDE tablet, film coated                                                | 16729-090-10 |
| FINASTERIDE tablet, film coated                                                | 16729-089-15 |
| BICALUTAMIDE tablet                                                            | 16729-023-10 |
| BICALUTAMIDE tablet, film coated                                               | 16714-571-02 |
| LARIN 24 FE (norethindrone acetate/ethinyl estradiol and ferrous fumarate) kit | 16714-416-02 |
| LARIN 1/20 (norethindrone acetate/ethinyl estradiol) kit                       | 16714-408-02 |
| LARIN 1.5/30 (norethindrone acetate/ethinyl estradiol) kit                     | 16714-407-02 |

|                                                                                       |              |
|---------------------------------------------------------------------------------------|--------------|
| LARIN FE 1/20 (norethindrone acetate/ethinyl estradiol and ferrous fumarate) kit      | 16714-406-02 |
| LARIN FE 1.5/30 (norethindrone acetate/ethinyl estradiol and ferrous fumarate) kit    | 16714-405-02 |
| TRI-LINYAH (norgestimate and ethinyl estradiol) kit                                   | 16714-363-02 |
| MONO-LINYAH (norgestimate and ethinyl estradiol) kit                                  | 16714-360-02 |
| EEMT (estrogens, esterified and methyltestosterone) tablet, coated                    | 15310-020-01 |
| ESTERIFIED ESTROGENS AND METHYLTESTOSTERONE tablet, film coated                       | 13925-172-01 |
| PROGESTERONE capsule                                                                  | 10888-7136-2 |
| SPIRONOLACTONE tablet [Repackaged]                                                    | 10544-523-90 |
| ESTRADIOL tablet [Repackaged]                                                         | 10544-070-30 |
| MEDROXYPROGESTERONE ACETATE tablet [Repackaged]                                       | 10544-062-10 |
| DUTASTERIDE AND TAMSULOSIN HYDROCHLORIDE capsule                                      | 10370-280-11 |
| SPIRONOLACTONE tablet                                                                 | 0904-5952-06 |
| ESTRADIOL patch, extended release                                                     | 0781-7129-58 |
| BICALUTAMIDE tablet                                                                   | 0781-5409-10 |
| ESTRADIOL VALERATE AND ESTRADIOL VALERATE/DIENOGEST kit                               | 0781-4110-52 |
| SPIRONOLACTONE tablet, film coated                                                    | 0781-1599-05 |
| MEDROXYPROGESTERONE ACETATE injection, suspension                                     | 0703-6801-04 |
| SPIRONOLACTONE tablet, film coated [Repackaged]                                       | 0615-8031-30 |
| SPIRONOLACTONE tablet, film coated [Repackaged]                                       | 0615-1535-31 |
| PREVIFEM / TRI-PREVIFEM (norgestimate and ethinyl estradiol) kit                      | 0603-7642-17 |
| GILDESS 24 FE (norethindrone acetate and ethinyl estradiol and ferrous fumarate)      | 0603-7610-17 |
| GILDESS FE 1/20 (norethindrone acetate, ethinyl estradiol and ferrous fumarate) kit   | 0603-7609-17 |
| GILDESS FE 1.5/30 (norethindrone acetate, ethinyl estradiol and ferrous fumarate) kit | 0603-7608-17 |
| GILDESS 1/20 (norethindrone acetate and ethinyl estradiol) tablet, film coated        | 0603-7607-15 |
| GILDESS 1.5/30 (norethindrone acetate and ethinyl estradiol) tablet, film coated      | 0603-7606-15 |
| SPIRONOLACTONE tablet, film coated                                                    | 0603-5763-28 |
| FINASTERIDE tablet, film coated                                                       | 0603-3633-16 |
| PROGESTERONE capsule                                                                  | 0591-3965-01 |
| DUTASTERIDE AND TAMSULOSIN HYDROCHLORIDE capsule                                      | 0591-3771-30 |
| DUTASTERIDE capsule                                                                   | 0591-2292-30 |
| ESTRADIOL tablet                                                                      | 0591-0487-05 |
| ESTRADIOL VALERATE injection, solution                                                | 0574-0872-05 |
| ESTRADIOL tablet                                                                      | 0555-0886-04 |
| MEDROXYPROGESTERONE ACETATE tablet                                                    | 0555-0779-04 |

|                                                                                                           |              |
|-----------------------------------------------------------------------------------------------------------|--------------|
| ESTRACE (estradiol) cream                                                                                 | 0430-3754-95 |
| ESTRACE (estradiol) tablet                                                                                | 0430-0721-24 |
| ESTROSTEP FE (norethindrone acetate and ethinyl estradiol and ferrous fumarate) kit                       | 0430-0570-45 |
| NORETHINDRONE ACETATE AND ETHINYL ESTRADIOL AND FERROUS FUMARATE (" and ", and ") kit                     | 0430-0539-50 |
| LO MINASTRIN FE (norethindrone acetate and ethinyl estradiol, ethinyl estradiol and ferrous fumarate) kit | 0430-0537-50 |
| MINASTRIN 24 FE (norethindrone acetate and ethinyl estradiol, and ferrous fumarate) kit                   | 0430-0535-50 |
| LOESTRIN 24 FE (norethindrone acetate and ethinyl estradiol, and ferrous fumarate) kit                    | 0430-0530-60 |
| LO LOESTRIN FE (norethindrone acetate and ethinyl estradiol, ethinyl estradiol and ferrous fumarate) kit  | 0430-0420-60 |
| NORETHINDRONE ACETATE AND ETHINYL ESTRADIOL ( norethindrone acetate and ethinyl estradiol ) kit           | 0378-7301-85 |
| NORETHINDRONE ACETATE AND ETHINYL ESTRADIOL ( norethindrone acetate and ethinyl estradiol ) kit           | 0378-7283-98 |
| NORETHINDRONE ACETATE AND ETHINYL ESTRADIOL tablet                                                        | 0378-7280-98 |
| NORGESTIMATE AND ETHINYL ESTRADIOL ( norgestimate and ethinyl estradiol ) kit                             | 0378-7277-85 |
| FINASTERIDE tablet, film coated                                                                           | 0378-5036-05 |
| ESTRADIOL patch                                                                                           | 0378-4640-26 |
| ESTRADIOL patch                                                                                           | 0378-3349-99 |
| ESTRADIOL tablet                                                                                          | 0378-1452-05 |
| SPIRONOLACTONE tablet, film coated                                                                        | 0378-0243-05 |
| SPIRONOLACTONE AND HYDROCHLOROTHIAZIDE tablet                                                             | 0378-0141-05 |
| CASODEX (bicalutamide) tablet                                                                             | 0310-0705-30 |
| LUPRON (leuprolide acetate) injection, solution                                                           | 0300-3612-28 |
| DIVIGEL (estradiol) gel                                                                                   | 0245-0880-66 |
| DIVIGEL (estradiol) gel                                                                                   | 0245-0880-66 |
| SPIRONOLACTONE tablet, film coated                                                                        | 0228-2672-50 |
| ESTRADIOL tablet [Repackaged]                                                                             | 0179-1999-30 |
| ESTRADIOL tablet [Repackaged]                                                                             | 0179-0074-70 |
| JALYN (dutasteride and tamsulosin hydrochloride) capsule                                                  | 0173-0809-59 |
| AVODART (dutasteride) capsule, liquid filled                                                              | 0173-0712-04 |
| FLUTAMIDE capsule                                                                                         | 0172-4960-60 |
| Innofem (Estradiol) tablet, film coated                                                                   | 0169-1842-82 |

|                                                                                            |              |
|--------------------------------------------------------------------------------------------|--------------|
| DUTASTERIDE capsule, liquid filled                                                         | 0115-1438-10 |
| FINASTERIDE tablet, film coated                                                            | 0093-7355-56 |
| DUTASTERIDE capsule, liquid filled                                                         | 0093-5655-98 |
| PROGESTERONE capsule                                                                       | 0093-5354-01 |
| JUNEL FE 24 (norethindrone acetate and ethinyl estradiol and ferrous fumarate) kit         | 0093-5328-62 |
| JINTELI (norethindrone acetate and ethinyl estradiol) tablet                               | 0093-3122-42 |
| TRI-LO-SPRINTEC (norgestimate and ethinyl estradiol) kit                                   | 0093-2140-62 |
| BICALUTAMIDE tablet, film coated                                                           | 0093-0220-56 |
| estraderm (estradiol) patch, extended release                                              | 0083-2310-62 |
| ESTRADERM- estradiol patch, extended release [Repackaged]                                  | 0083-2310-62 |
| LUPRON DEPOT (leuprolide acetate) kit                                                      | 0074-3641-71 |
| LUPRON DEPOT (leuprolide acetate) kit                                                      | 0074-3473-03 |
| LUPRON DEPOT-PED (leuprolide acetate) kit                                                  | 0074-2282-03 |
| LUPANETA PACK (leuprolide acetate and norethindrone acetate) kit                           | 0074-1052-10 |
| DUTASTERIDE capsule                                                                        | 0054-0395-22 |
| PREMPHASE (conjugated estrogens and medroxyprogesterone acetate) kit, tablet, sugar coated | 0046-1105-51 |
| PREMARIN (estrogens, conjugated) tablet, film coated                                       | 0046-1100-81 |
| PREMARIN VAGINAL (conjugated estrogens) cream                                              | 0046-0872-21 |
| ELESTRIN (estradiol gel 0.06%) gel, metered                                                | 0037-4802-35 |
| PROMETRIUM (progesterone) capsule                                                          | 0032-1711-01 |
| ALDACTONE- spironolactone tablet, film coated                                              | 0025-1031-31 |
| PROVERA (medroxyprogesterone acetate) tablet                                               | 0009-0050-11 |
| PROSCAR- finasteride tablet, film coated                                                   | 0006-0072-58 |
| PROPECIA (finasteride) tablet, film coated                                                 | 0006-0071-31 |
| ALDACTONE- spironolactone tablet, film coated                                              | 0025-1041-31 |
| FINASTERIDE tablet, film coated                                                            | 45963-600-11 |
| PROPECIA (finasteride) tablet, film coated                                                 | 0006-0071-54 |
| PROVERA (medroxyprogesterone acetate) tablet                                               | 0009-0064-04 |
| PREMARIN (estrogens, conjugated) tablet, film coated                                       | 0046-1100-91 |
| PREMPHASE (conjugated estrogens and medroxyprogesterone acetate) kit, tablet, sugar coated | 0046-1106-11 |
| LUPRON DEPOT-PED (leuprolide acetate) kit                                                  | 0074-2440-03 |
| LUPRON DEPOT (leuprolide acetate) kit                                                      | 0074-3642-03 |
| estraderm (estradiol) patch, extended release                                              | 0083-2320-08 |
| ESTRADERM- estradiol patch, extended release [Repackaged]                                  | 0083-2320-08 |

|                                                                                                           |              |
|-----------------------------------------------------------------------------------------------------------|--------------|
| JINTELI (norethindrone acetate and ethinyl estradiol) tablet                                              | 0093-3122-98 |
| FINASTERIDE tablet, film coated                                                                           | 0093-7355-98 |
| Innofem (Estradiol) tablet, film coated                                                                   | 0169-1843-81 |
| FLUTAMIDE capsule                                                                                         | 0172-4960-70 |
| AVODART (dutasteride) capsule, liquid filled                                                              | 0173-0712-15 |
| JALYN (dutasteride and tamsulosin hydrochloride) capsule                                                  | 0173-0809-61 |
| ESTRADIOL tablet [Repackaged]                                                                             | 0179-1999-60 |
| SPIRONOLACTONE tablet, film coated                                                                        | 0228-2673-11 |
| DIVIGEL (estradiol) gel                                                                                   | 0245-0880-89 |
| DIVIGEL (estradiol) gel                                                                                   | 0245-0880-89 |
| CASODEX (bicalutamide) tablet                                                                             | 0310-0705-39 |
| SPIRONOLACTONE tablet, film coated                                                                        | 0378-0437-01 |
| ESTRADIOL tablet                                                                                          | 0378-1454-01 |
| ESTRADIOL patch                                                                                           | 0378-3350-16 |
| ESTRADIOL patch                                                                                           | 0378-4641-16 |
| FINASTERIDE tablet, film coated                                                                           | 0378-5036-77 |
| LO LOESTRIN FE (norethindrone acetate and ethinyl estradiol, ethinyl estradiol and ferrous fumarate) kit  | 0430-0420-95 |
| LOESTRIN 24 FE (norethindrone acetate and ethinyl estradiol, and ferrous fumarate) kit                    | 0430-0530-95 |
| MINASTRIN 24 FE (norethindrone acetate and ethinyl estradiol, and ferrous fumarate) kit                   | 0430-0535-95 |
| LO MINASTRIN FE (norethindrone acetate and ethinyl estradiol, ethinyl estradiol and ferrous fumarate) kit | 0430-0537-95 |
| NORETHINDRONE ACETATE AND ETHINYL ESTRADIOL AND FERROUS FUMARATE (" and ", and ") kit                     | 0430-0539-95 |
| ESTROSTEP FE (norethindrone acetate and ethinyl estradiol and ferrous fumarate) kit                       | 0430-0570-60 |
| ESTRACE (estradiol) tablet                                                                                | 0430-0722-24 |
| MEDROXYPROGESTERONE ACETATE tablet                                                                        | 0555-0872-02 |
| ESTRADIOL tablet                                                                                          | 0555-0887-02 |
| ESTRADIOL tablet                                                                                          | 0591-0488-01 |
| FINASTERIDE tablet, film coated                                                                           | 0603-3633-21 |
| SPIRONOLACTONE tablet, film coated                                                                        | 0603-5763-30 |
| GILDESS 1.5/30 (norethindrone acetate and ethinyl estradiol) tablet, film coated                          | 0603-7606-48 |
| GILDESS 1/20 (norethindrone acetate and ethinyl estradiol) tablet, film coated                            | 0603-7607-48 |
| GILDESS 24 FE (norethindrone acetate and ethinyl estradiol and ferrous fumarate)                          | 0603-7610-49 |



|                                                                                    |              |
|------------------------------------------------------------------------------------|--------------|
| PREVIFEM / TRI-PREVIFEM (norgestimate and ethinyl estradiol) kit                   | 0603-7663-01 |
| SPIRONOLACTONE tablet, film coated [Repackaged]                                    | 0615-1535-39 |
| SPIRONOLACTONE tablet, film coated [Repackaged]                                    | 0615-8031-39 |
| SPIRONOLACTONE tablet, film coated                                                 | 0781-1599-10 |
| BICALUTAMIDE tablet                                                                | 0781-5409-31 |
| ESTRADIOL patch, extended release                                                  | 0781-7129-83 |
| SPIRONOLACTONE tablet                                                              | 0904-5953-06 |
| MONO-LINYAH (norgestimate and ethinyl estradiol) kit                               | 16714-360-03 |
| TRI-LINYAH (norgestimate and ethinyl estradiol) kit                                | 16714-363-03 |
| LARIN FE 1.5/30 (norethindrone acetate/ethinyl estradiol and ferrous fumarate) kit | 16714-405-03 |
| LARIN FE 1/20 (norethindrone acetate/ethinyl estradiol and ferrous fumarate) kit   | 16714-406-03 |
| LARIN 1.5/30 (norethindrone acetate/ethinyl estradiol) kit                         | 16714-407-03 |
| LARIN 1/20 (norethindrone acetate/ethinyl estradiol) kit                           | 16714-408-03 |
| LARIN 24 FE (norethindrone acetate/ethinyl estradiol and ferrous fumarate) kit     | 16714-416-03 |
| BICALUTAMIDE tablet, film coated                                                   | 16714-571-03 |
| FINASTERIDE tablet, film coated                                                    | 16729-090-15 |
| ESTROGEL (estradiol) gel, metered                                                  | 17139-617-43 |
| ELESTRIN (estradiol) gel                                                           | 18860-480-60 |
| ESTRADIOL tablet [Repackaged]                                                      | 21695-623-00 |
| MEDROXYPROGESTERONE ACETATE tablet [Repackaged]                                    | 21695-896-30 |
| ESTRADIOL tablet                                                                   | 23155-014-05 |
| FINASTERIDE tablet, film coated                                                    | 31722-525-10 |
| FINASTERIDE tablet, film coated                                                    | 31722-525-10 |
| FINASTERIDE tablet, film coated                                                    | 31722-526-90 |
| MEDROXYPROGESTERONE ACETATE tablet [Repackaged]                                    | 33261-534-14 |
| ESTRADIOL tablet [Repackaged]                                                      | 33261-714-60 |
| SPIRONOLACTONE tablet, film coated [Repackaged]                                    | 33261-895-30 |
| PREMARIN (conjugated estrogens) tablet, film coated [Repackaged]                   | 35356-251-00 |
| SPIRONOLACTONE tablet, film coated [Repackaged]                                    | 35356-969-90 |
| BICALUTAMIDE tablet                                                                | 41616-485-83 |
| DELESTROGEN- estradiol valerate injection                                          | 42023-112-01 |
| ESTRADIOL VALERATE injection                                                       | 42023-136-01 |
| SPIRONOLACTONE tablet [Repackaged]                                                 | 43063-072-90 |
| ESTRADIOL (estradiol) tablet [Repackaged]                                          | 43063-201-90 |

|                                                                        |              |
|------------------------------------------------------------------------|--------------|
| MEDROXYPROGESTERONE ACETATE tablet [Repackaged]                        | 43063-438-10 |
| ESTRADIOL tablet [Repackaged]                                          | 43063-446-90 |
| FINASTERIDE tablet, film coated                                        | 45963-500-30 |
| BICALUTAMIDE tablet, film coated                                       | 47335-485-83 |
| FINASTERIDE tablet, film coated                                        | 47335-714-81 |
| FINASTERIDE tablet, film coated                                        | 47335-715-18 |
| ESTRADIOL TRANSDERMAL SYSTEM (estradiol) patch                         | 47781-206-04 |
| PREMARIN (conjugated estrogens) tablet, film coated [Repackaged]       | 49999-109-90 |
| SPIRONOLACTONE tablet [Repackaged]                                     | 50090-0136-3 |
| ESTRADIOL (estradiol) tablet [Repackaged]                              | 50268-291-11 |
| CLIMARA (estradiol) patch [Repackaged]                                 | 50419-452-01 |
| ORTHO TRI CYCLEN (norgestimate and ethinyl estradiol) kit              | 50458-191-15 |
| ORTHO TRI CYCLEN LO (norgestimate and ethinyl estradiol) kit           | 50458-251-15 |
| SPIRONOLACTONE tablet, film coated [Repackaged]                        | 51079-103-19 |
| FINASTERIDE tablet, film coated                                        | 51079-321-30 |
| FINASTERIDE tablet, film coated                                        | 51079-520-30 |
| ENJUVA (synthetic conjugated estrogens, b) tablet, film coated         | 51285-408-02 |
| MICROGESTIN (norethindrone acetate and ethinyl estradiol) tablet / kit | 52544-276-21 |
| SPIRONOLACTONE tablet                                                  | 53489-143-10 |
| SPIRONOLACTONE AND HYDROCHLOROTHIAZIDE tablet                          | 53489-144-10 |
| SPIRONOLACTONE tablet, film coated                                     | 53489-328-03 |
| SPIRONOLACTONE tablet                                                  | 53746-511-10 |
| SPIRONOLACTONE tablet, film coated [Repackaged]                        | 54569-0505-3 |
| PREMARIN (conjugated estrogens) tablet, film coated [Repackaged]       | 54569-0813-1 |
| MEDROXYPROGESTERONE ACETATE tablet [Repackaged]                        | 54569-3807-1 |
| FINASTERIDE tablet, film coated [Repackaged]                           | 54569-6048-2 |
| MEDROXYPROGESTERONE ACETATE tablet [Repackaged]                        | 54868-0109-2 |
| PREMARIN (conjugated estrogens) tablet, film coated [Repackaged]       | 54868-0365-3 |
| SPIRONOLACTONE tablet, film coated [Repackaged]                        | 54868-0700-5 |
| ESTRADIOL tablet [Repackaged]                                          | 54868-4030-2 |
| PROMETRIUM (progesterone) capsule [Repackaged]                         | 54868-4230-2 |
| VIVELLE DOT - estradiol patch, extended release [Repackaged]           | 54868-4244-0 |
| CENESTIN - synthetic conjugated estrogens, a tablet, film coated       | 54868-4879-0 |
| ESTRADIOL patch [Repackaged]                                           | 54868-5009-0 |

|                                                                                                  |              |
|--------------------------------------------------------------------------------------------------|--------------|
| PREMPRO (conjugated estrogens and medroxyprogesterone acetate) tablet, sugar coated [Repackaged] | 54868-5047-0 |
| FINASTERIDE tablet, film coated [Repackaged]                                                     | 54868-5636-2 |
| ENJUVIA (synthetic conjugated estrogens, b) tablet [Repackaged]                                  | 54868-6164-0 |
| MENEST (estrogens, esterified) tablet [Repackaged]                                               | 54868-6211-0 |
| CRINONE (progesterone) gel                                                                       | 55056-0818-2 |
| PROCHIEVE (progesterone) gel                                                                     | 55056-1601-6 |
| FINASTERIDE tablet, film coated                                                                  | 55111-171-30 |
| FINASTERIDE tablet                                                                               | 55111-172-30 |
| PREMARIN (conjugated estrogens) tablet, film coated [Repackaged]                                 | 55154-0216-6 |
| MEDROXYPROGESTERONE ACETATE tablet [Repackaged]                                                  | 55154-0533-6 |
| SPIRONOLACTONE tablet, film coated [Repackaged]                                                  | 55154-5517-0 |
| ESTRADIOL tablet [Repackaged]                                                                    | 55154-6242-6 |
| MEDROXYPROGESTERONE ACETATE tablet [Repackaged]                                                  | 55289-160-10 |
| SPIRONOLACTONE tablet, film coated [Repackaged]                                                  | 55289-507-90 |
| ESTRADIOL tablet [Repackaged]                                                                    | 55289-603-30 |
| ESTRADIOL tablet [Repackaged]                                                                    | 55289-761-90 |
| FINASTERIDE tablet, film coated                                                                  | 57237-062-90 |
| FINASTERIDE tablet, film coated [Repackaged]                                                     | 58118-7355-8 |
| SPIRONOLACTONE (spironolactone) tablet, film coated                                              | 59746-216-10 |
| MEDROXYPROGESTERONE ACETATE tablet                                                               | 59762-3741-1 |
| MEDROXYPROGESTERONE ACETATE injection, suspension                                                | 59762-4538-1 |
| SPIRONOLACTONE tablet, film coated                                                               | 59762-5012-1 |
| BICALUTAMIDE tablet, film coated [Repackaged]                                                    | 60429-177-30 |
| ESTRADIOL tablet [Repackaged]                                                                    | 60429-328-05 |
| MENEST (esterified estrogens) tablet, film coated                                                | 61570-074-01 |
| ESTRADIOL tablet [Repackaged]                                                                    | 63187-482-90 |
| SPIRONOLACTONE tablet, film coated [Repackaged]                                                  | 63187-634-90 |
| DUTASTERIDE capsule [Repackaged]                                                                 | 63187-657-90 |
| FINASTERIDE tablet, film coated [Repackaged]                                                     | 63629-1585-3 |
| SPIRONOLACTONE tablet [Repackaged]                                                               | 63629-1830-3 |
| MEDROXYPROGESTERONE ACETATE tablet [Repackaged]                                                  | 63629-2612-3 |
| MEDROXYPROGESTERONE ACETATE tablet [Repackaged]                                                  | 63629-2613-3 |
| ESTRADIOL tablet [Repackaged]                                                                    | 63629-3755-3 |

|                                                                           |              |
|---------------------------------------------------------------------------|--------------|
| ESTRADIOL tablet [Repackaged]                                             | 63629-4788-3 |
| ESTRADIOL tablet [Repackaged]                                             | 63629-5208-3 |
| FINASTERIDE tablet, film coated                                           | 63739-495-43 |
| SPIRONOLACTONE tablet [Repackaged]                                        | 63739-545-10 |
| MEDROXYPROGESTERONE ACETATE tablet [Repackaged]                           | 64205-087-90 |
| ESTRADIOL tablet [Repackaged]                                             | 64205-488-30 |
| SPIRONOLACTONE tablet                                                     | 65162-511-09 |
| BICALUTAMIDE tablet, film coated                                          | 65841-613-06 |
| FINASTERIDE tablet, film coated                                           | 65862-149-30 |
| FINASTERIDE tablet, film coated                                           | 65862-686-99 |
| MILI (norgestimate and ethinyl estradiol) kit                             | 65862-776-86 |
| TRI-MILI (norgestimate and ethinyl estradiol) kit                         | 65862-777-86 |
| FINASTERIDE tablet                                                        | 65977-5025-2 |
| DIVIGEL (estradiol) gel                                                   | 68025-065-30 |
| DIVIGEL (estradiol) gel                                                   | 68025-065-30 |
| SPIRONOLACTONE tablet, film coated [Repackaged]                           | 68084-207-01 |
| SPIRONOLACTONE AND HYDROCHLOROTHIAZIDE tablet [Repackaged]                | 68084-946-25 |
| FYAVOLV (norethindrone acetate and ethinyl estradiol) tablet, film coated | 68180-827-13 |
| BICALUTAMIDE tablet, film coated                                          | 68382-224-06 |
| NORETHINDRONE ACETATE AND ETHINYL ESTRADIOL tablet                        | 68462-657-29 |
| FINASTERIDE tablet, film coated                                           | 68554-3025-2 |
| FINASTERIDE tablet, film coated                                           | 68554-3026-2 |
| SPIRONOLACTONE tablet [Repackaged]                                        | 68788-9124-9 |
| SPIRONOLACTONE tablet, film coated [Repackaged]                           | 68788-9227-9 |
| FINASTERIDE tablet, film coated [Repackaged]                              | 68788-9249-9 |
| ESTRADIOL tablet [Repackaged]                                             | 68788-9416-6 |
| FINASTERIDE tablet, film coated [Repackaged]                              | 68788-9517-6 |
| FINASTERIDE tablet [Repackaged]                                           | 68788-9519-9 |
| SPIRONOLACTONE tablet [Repackaged]                                        | 68788-9729-9 |
| ESTRADIOL tablet [Repackaged]                                             | 68788-9901-6 |
| ESTRADIOL pellet                                                          | 69761-006-30 |
| ESTRADIOL pellet                                                          | 69761-010-30 |
| ESTRADIOL pellet                                                          | 69761-012-30 |
| ESTRADIOL pellet                                                          | 69761-015-30 |

|                                                                                            |              |
|--------------------------------------------------------------------------------------------|--------------|
| ESTRADIOL pellet                                                                           | 69761-018-30 |
| ESTRADIOL pellet                                                                           | 69761-020-30 |
| ESTRADIOL pellet                                                                           | 69761-022-30 |
| ESTRADIOL pellet                                                                           | 69761-025-30 |
| FINASTERIDE tablet, film coated                                                            | 76282-412-30 |
| PROVERA (medroxyprogesterone acetate) tablet                                               | 0009-0064-06 |
| PREMARIN (estrogens, conjugated) tablet, film coated                                       | 0046-1101-81 |
| PREMPHASE (conjugated estrogens and medroxyprogesterone acetate) kit, tablet, sugar coated | 0046-1106-51 |
| LUPRON DEPOT (leuprolide acetate) kit                                                      | 0074-3683-03 |
| LUPRON DEPOT-PED (leuprolide acetate) kit                                                  | 0074-3779-03 |
| estraderm (estradiol) patch, extended release                                              | 0083-2320-62 |
| ESTRADERM- estradiol patch, extended release [Repackaged]                                  | 0083-2320-62 |
| Innofem (Estradiol) tablet, film coated                                                    | 0169-1843-82 |
| ESTRADIOL tablet [Repackaged]                                                              | 0179-1999-70 |
| SPIRONOLACTONE tablet, film coated                                                         | 0228-2673-50 |
| DIVIGEL (estradiol) gel                                                                    | 0245-0881-30 |
| DIVIGEL (estradiol) gel                                                                    | 0245-0881-30 |
| ESTRADIOL tablet                                                                           | 0378-1454-05 |
| SPIRONOLACTONE tablet, film coated                                                         | 0378-2146-01 |
| ESTRADIOL patch                                                                            | 0378-3350-99 |
| ESTRADIOL patch                                                                            | 0378-4641-26 |
| FINASTERIDE tablet, film coated                                                            | 0378-5036-93 |
| MEDROXYPROGESTERONE ACETATE tablet                                                         | 0555-0872-04 |
| ESTRADIOL tablet                                                                           | 0555-0887-04 |
| ESTRADIOL tablet                                                                           | 0591-0488-05 |
| FINASTERIDE tablet, film coated                                                            | 0603-3633-28 |
| SPIRONOLACTONE tablet, film coated                                                         | 0603-5763-32 |
| PREVIFEM / TRI-PREVIFEM (norgestimate and ethinyl estradiol) kit                           | 0603-7663-17 |
| SPIRONOLACTONE tablet, film coated [Repackaged]                                            | 0615-5592-39 |
| BICALUTAMIDE tablet                                                                        | 0781-5409-64 |
| ESTRADIOL patch, extended release                                                          | 0781-7138-40 |
| MONO-LINYAH (norgestimate and ethinyl estradiol) kit                                       | 16714-360-04 |
| TRI-LINYAH (norgestimate and ethinyl estradiol) kit                                        | 16714-363-04 |
| LARIN FE 1.5/30 (norethindrone acetate/ethinyl estradiol and ferrous fumarate) kit         | 16714-405-04 |

|                                                                                  |              |
|----------------------------------------------------------------------------------|--------------|
| LARIN FE 1/20 (norethindrone acetate/ethinyl estradiol and ferrous fumarate) kit | 16714-406-04 |
| LARIN 1.5/30 (norethindrone acetate/ethinyl estradiol) kit                       | 16714-407-04 |
| LARIN 1/20 (norethindrone acetate/ethinyl estradiol) kit                         | 16714-408-04 |
| LARIN 24 FE (norethindrone acetate/ethinyl estradiol and ferrous fumarate) kit   | 16714-416-04 |
| FINASTERIDE tablet, film coated                                                  | 16729-090-16 |
| ESTRADIOL tablet [Repackaged]                                                    | 21695-623-30 |
| ESTRADIOL tablet                                                                 | 23155-015-01 |
| FINASTERIDE tablet, film coated                                                  | 31722-525-30 |
| FINASTERIDE tablet, film coated                                                  | 31722-525-30 |
| MEDROXYPROGESTERONE ACETATE tablet [Repackaged]                                  | 33261-534-30 |
| PREMARIN (conjugated estrogens) tablet, film coated [Repackaged]                 | 35356-426-30 |
| BICALUTAMIDE tablet                                                              | 41616-485-88 |
| MEDROXYPROGESTERONE ACETATE tablet [Repackaged]                                  | 43063-438-13 |
| BICALUTAMIDE tablet, film coated                                                 | 47335-485-88 |
| FINASTERIDE tablet, film coated                                                  | 47335-714-83 |
| FINASTERIDE tablet, film coated                                                  | 47335-715-81 |
| ESTRADIOL TRANSDERMAL SYSTEM (estradiol) patch                                   | 47781-207-04 |
| SPIRONOLACTONE tablet [Repackaged]                                               | 50090-0136-6 |
| ESTRADIOL (estradiol) tablet [Repackaged]                                        | 50268-291-15 |
| CLIMARA (estradiol) patch [Repackaged]                                           | 50419-452-04 |
| ORTHO TRI CYCLEN (norgestimate and ethinyl estradiol) kit                        | 50458-191-20 |
| ORTHO TRI CYCLEN LO (norgestimate and ethinyl estradiol) kit                     | 50458-251-20 |
| SPIRONOLACTONE tablet, film coated [Repackaged]                                  | 51079-103-20 |
| FINASTERIDE tablet, film coated                                                  | 51079-321-56 |
| FINASTERIDE tablet, film coated                                                  | 51079-520-56 |
| ENJUVIA (synthetic conjugated estrogens, b) tablet, film coated                  | 51285-409-02 |
| MICROGESTIN (norethindrone acetate and ethinyl estradiol) tablet / kit           | 52544-290-21 |
| SPIRONOLACTONE tablet, film coated                                               | 53489-328-05 |
| SPIRONOLACTONE tablet                                                            | 53746-511-30 |
| SPIRONOLACTONE tablet, film coated [Repackaged]                                  | 54569-0505-5 |
| MEDROXYPROGESTERONE ACETATE tablet [Repackaged]                                  | 54868-0109-3 |
| PREMARIN (conjugated estrogens) tablet, film coated [Repackaged]                 | 54868-0451-2 |
| SPIRONOLACTONE tablet, film coated [Repackaged]                                  | 54868-0700-6 |
| ESTRADIOL tablet [Repackaged]                                                    | 54868-4031-0 |

|                                                                                                  |              |
|--------------------------------------------------------------------------------------------------|--------------|
| PROMETRIUM (progesterone) capsule [Repackaged]                                                   | 54868-4250-0 |
| VIVELLE DOT - estradiol patch, extended release [Repackaged]                                     | 54868-4862-0 |
| CENESTIN - synthetic conjugated estrogens, a tablet, film coated                                 | 54868-4879-1 |
| PREMPRO (conjugated estrogens and medroxyprogesterone acetate) tablet, sugar coated [Repackaged] | 54868-5540-0 |
| ENJUVIA (synthetic conjugated estrogens, b) tablet [Repackaged]                                  | 54868-6164-1 |
| MENEST (estrogens, esterified) tablet [Repackaged]                                               | 54868-6211-1 |
| CRINONE (progesterone) gel                                                                       | 55056-0818-5 |
| PROCHIEVE (progesterone) gel                                                                     | 55056-1601-8 |
| FINASTERIDE tablet, film coated                                                                  | 55111-171-90 |
| FINASTERIDE tablet                                                                               | 55111-172-78 |
| PREMARIN (conjugated estrogens) tablet, film coated [Repackaged]                                 | 55154-0217-0 |
| MEDROXYPROGESTERONE ACETATE tablet [Repackaged]                                                  | 55289-160-13 |
| ESTRADIOL tablet [Repackaged]                                                                    | 55289-603-90 |
| SPIRONOLACTONE (spironolactone) tablet, film coated                                              | 59746-217-01 |
| MEDROXYPROGESTERONE ACETATE tablet                                                               | 59762-3741-4 |
| MEDROXYPROGESTERONE ACETATE injection, suspension                                                | 59762-4538-2 |
| SPIRONOLACTONE tablet, film coated                                                               | 59762-5013-1 |
| ESTRADIOL tablet [Repackaged]                                                                    | 60429-329-01 |
| MENEST (esterified estrogens) tablet, film coated                                                | 61570-075-50 |
| FINASTERIDE tablet, film coated [Repackaged]                                                     | 63629-1585-4 |
| SPIRONOLACTONE tablet [Repackaged]                                                               | 63629-1830-4 |
| MEDROXYPROGESTERONE ACETATE tablet [Repackaged]                                                  | 63629-2612-4 |
| MEDROXYPROGESTERONE ACETATE tablet [Repackaged]                                                  | 63629-2613-4 |
| ESTRADIOL tablet [Repackaged]                                                                    | 63629-3755-4 |
| ESTRADIOL tablet [Repackaged]                                                                    | 63629-4788-4 |
| ESTRADIOL tablet [Repackaged]                                                                    | 63629-5208-4 |
| ESTRADIOL tablet [Repackaged]                                                                    | 64205-488-90 |
| SPIRONOLACTONE tablet                                                                            | 65162-511-10 |
| BICALUTAMIDE tablet, film coated                                                                 | 65841-613-10 |
| FINASTERIDE tablet, film coated                                                                  | 65862-149-90 |
| MILI (norgestimate and ethinyl estradiol) kit                                                    | 65862-776-87 |
| TRI-MILI (norgestimate and ethinyl estradiol) kit                                                | 65862-777-87 |
| FINASTERIDE tablet, film coated                                                                  | 65862-927-30 |

|                                                                                            |              |
|--------------------------------------------------------------------------------------------|--------------|
| FINASTERIDE tablet                                                                         | 65977-5025-3 |
| DIVIGEL (estradiol) gel                                                                    | 68025-066-01 |
| DIVIGEL (estradiol) gel                                                                    | 68025-066-01 |
| SPIRONOLACTONE tablet, film coated [Repackaged]                                            | 68084-207-11 |
| SPIRONOLACTONE AND HYDROCHLOROTHIAZIDE tablet [Repackaged]                                 | 68084-946-95 |
| FYAVOLV (norethindrone acetate and ethinyl estradiol) tablet, film coated                  | 68180-828-09 |
| BICALUTAMIDE tablet, film coated                                                           | 68382-224-10 |
| NORETHINDRONE ACETATE AND ETHINYL ESTRADIOL tablet                                         | 68462-657-90 |
| FINASTERIDE tablet, film coated                                                            | 68554-3025-3 |
| ESTRADIOL tablet [Repackaged]                                                              | 68788-9416-9 |
| FINASTERIDE tablet, film coated [Repackaged]                                               | 68788-9517-9 |
| ESTRADIOL tablet [Repackaged]                                                              | 68788-9901-9 |
| FINASTERIDE tablet, film coated                                                            | 76282-412-90 |
| PROVERA (medroxyprogesterone acetate) tablet                                               | 0009-0286-03 |
| PREMARIN (estrogens, conjugated) tablet, film coated                                       | 0046-1102-51 |
| PREMPHASE (conjugated estrogens and medroxyprogesterone acetate) kit, tablet, sugar coated | 0046-1107-11 |
| LUPRON DEPOT-PED (leuprolide acetate) kit                                                  | 0074-9694-03 |
| Innofem (Estradiol) tablet, film coated                                                    | 0169-1844-81 |
| ESTRADIOL tablet [Repackaged]                                                              | 0179-1999-88 |
| SPIRONOLACTONE tablet, film coated                                                         | 0228-2803-11 |
| DIVIGEL (estradiol) gel                                                                    | 0245-0881-66 |
| DIVIGEL (estradiol) gel                                                                    | 0245-0881-66 |
| ESTRADIOL tablet                                                                           | 0378-1458-01 |
| SPIRONOLACTONE tablet, film coated                                                         | 0378-2146-05 |
| ESTRADIOL patch                                                                            | 0378-3351-16 |
| ESTRADIOL patch                                                                            | 0378-4642-16 |
| MEDROXYPROGESTERONE ACETATE tablet                                                         | 0555-0873-02 |
| ESTRADIOL tablet                                                                           | 0555-0899-02 |
| ESTRADIOL tablet                                                                           | 0591-0528-01 |
| SPIRONOLACTONE tablet, film coated                                                         | 0603-5764-21 |
| SPIRONOLACTONE tablet, film coated [Repackaged]                                            | 0615-6591-39 |
| ESTRADIOL patch, extended release                                                          | 0781-7138-58 |
| FINASTERIDE tablet, film coated                                                            | 16729-090-17 |
| FINASTERIDE tablet, film coated                                                            | 31722-525-90 |



|                                                                  |              |
|------------------------------------------------------------------|--------------|
| FINASTERIDE tablet, film coated                                  | 31722-525-90 |
| MEDROXYPROGESTERONE ACETATE tablet [Repackaged]                  | 33261-609-30 |
| MEDROXYPROGESTERONE ACETATE tablet [Repackaged]                  | 43063-438-30 |
| FINASTERIDE tablet, film coated                                  | 47335-714-88 |
| FINASTERIDE tablet, film coated                                  | 47335-715-83 |
| ESTRADIOL TRANSDERMAL SYSTEM (estradiol) patch                   | 47781-208-04 |
| ESTRADIOL (estradiol) tablet [Repackaged]                        | 50268-292-11 |
| CLIMARA (estradiol) patch [Repackaged]                           | 50419-453-01 |
| ORTHO TRI CYCLEN (norgestimate and ethinyl estradiol) kit        | 50458-197-00 |
| SPIRONOLACTONE tablet, film coated [Repackaged]                  | 51079-103-63 |
| ENJUVIA (synthetic conjugated estrogens, b) tablet, film coated  | 51285-410-02 |
| SPIRONOLACTONE tablet, film coated                               | 53489-328-06 |
| SPIRONOLACTONE tablet                                            | 53746-511-60 |
| SPIRONOLACTONE tablet, film coated [Repackaged]                  | 54569-0505-6 |
| MEDROXYPROGESTERONE ACETATE tablet [Repackaged]                  | 54868-0109-5 |
| PREMARIN (conjugated estrogens) tablet, film coated [Repackaged] | 54868-0451-6 |
| ESTRADIOL tablet [Repackaged]                                    | 54868-4031-1 |
| PROMETRIUM (progesterone) capsule [Repackaged]                   | 54868-4250-1 |
| SPIRONOLACTONE tablet, film coated [Repackaged]                  | 54868-4477-0 |
| CENESTIN - synthetic conjugated estrogens, a tablet, film coated | 54868-4879-2 |
| VIVELLE DOT - estradiol patch, extended release [Repackaged]     | 54868-4920-0 |
| ENJUVIA (synthetic conjugated estrogens, b) tablet [Repackaged]  | 54868-6165-0 |
| MENEST (estrogens, esterified) tablet [Repackaged]               | 54868-6212-0 |
| CRINONE (progesterone) gel                                       | 55056-0818-9 |
| FINASTERIDE tablet                                               | 55111-172-79 |
| PREMARIN (conjugated estrogens) tablet, film coated [Repackaged] | 55154-0217-4 |
| MEDROXYPROGESTERONE ACETATE tablet [Repackaged]                  | 55289-160-30 |
| SPIRONOLACTONE (spironolactone) tablet, film coated              | 59746-217-05 |
| MEDROXYPROGESTERONE ACETATE tablet                               | 59762-3742-2 |
| MEDROXYPROGESTERONE ACETATE injection, suspension                | 59762-4538-9 |
| ESTRADIOL tablet [Repackaged]                                    | 60429-329-05 |
| SPIRONOLACTONE tablet [Repackaged]                               | 63629-1830-5 |
| MEDROXYPROGESTERONE ACETATE tablet [Repackaged]                  | 63629-2612-5 |
| SPIRONOLACTONE tablet                                            | 65162-511-11 |

|                                                                                            |              |
|--------------------------------------------------------------------------------------------|--------------|
| BICALUTAMIDE tablet, film coated                                                           | 65841-613-30 |
| MILI (norgestimate and ethinyl estradiol) kit                                              | 65862-776-88 |
| TRI-MILI (norgestimate and ethinyl estradiol) kit                                          | 65862-777-88 |
| FINASTERIDE tablet, film coated                                                            | 65862-927-90 |
| FINASTERIDE tablet                                                                         | 65977-5025-4 |
| DIVIGEL (estradiol) gel                                                                    | 68025-066-07 |
| DIVIGEL (estradiol) gel                                                                    | 68025-066-07 |
| SPIRONOLACTONE tablet, film coated [Repackaged]                                            | 68084-208-01 |
| FYAVOLV (norethindrone acetate and ethinyl estradiol) tablet, film coated                  | 68180-828-11 |
| BICALUTAMIDE tablet, film coated                                                           | 68382-224-30 |
| FINASTERIDE tablet, film coated                                                            | 68554-3025-4 |
| SPIRONOLACTONE tablet                                                                      | 65162-511-50 |
| PREMARIN (estrogens, conjugated) tablet, film coated                                       | 0046-1102-81 |
| PREMPHASE (conjugated estrogens and medroxyprogesterone acetate) kit, tablet, sugar coated | 0046-1108-11 |
| Innofem (Estradiol) tablet, film coated                                                    | 0169-1844-82 |
| ESTRADIOL tablet [Repackaged]                                                              | 0179-1999-90 |
| SPIRONOLACTONE tablet, film coated                                                         | 0228-2803-50 |
| DIVIGEL (estradiol) gel                                                                    | 0245-0881-89 |
| DIVIGEL (estradiol) gel                                                                    | 0245-0881-89 |
| ESTRADIOL tablet                                                                           | 0378-1458-05 |
| ESTRADIOL patch                                                                            | 0378-3351-99 |
| ESTRADIOL patch                                                                            | 0378-4642-26 |
| MEDROXYPROGESTERONE ACETATE tablet                                                         | 0555-0873-04 |
| ESTRADIOL tablet                                                                           | 0591-0528-05 |
| SPIRONOLACTONE tablet, film coated                                                         | 0603-5764-28 |
| ESTRADIOL patch, extended release                                                          | 0781-7138-83 |
| MEDROXYPROGESTERONE ACETATE tablet [Repackaged]                                            | 33261-740-20 |
| MEDROXYPROGESTERONE ACETATE tablet [Repackaged]                                            | 43063-438-40 |
| FINASTERIDE tablet, film coated                                                            | 47335-715-88 |
| ESTRADIOL TRANSDERMAL SYSTEM (estradiol) patch                                             | 47781-209-04 |
| ESTRADIOL (estradiol) tablet [Repackaged]                                                  | 50268-292-15 |
| CLIMARA (estradiol) patch [Repackaged]                                                     | 50419-453-04 |
| ORTHO TRI CYCLEN (norgestimate and ethinyl estradiol) kit                                  | 50458-197-12 |
| SPIRONOLACTONE tablet, film coated [Repackaged]                                            | 51079-979-01 |

|                                                                                            |              |
|--------------------------------------------------------------------------------------------|--------------|
| SPIRONOLACTONE tablet, film coated                                                         | 53489-328-07 |
| SPIRONOLACTONE tablet                                                                      | 53746-511-90 |
| MEDROXYPROGESTERONE ACETATE tablet [Repackaged]                                            | 54868-0109-6 |
| PREMARIN (conjugated estrogens) tablet, film coated [Repackaged]                           | 54868-0453-0 |
| ESTRADIOL tablet [Repackaged]                                                              | 54868-4031-2 |
| SPIRONOLACTONE tablet, film coated [Repackaged]                                            | 54868-4477-1 |
| CENESTIN - synthetic conjugated estrogens, a tablet, film coated                           | 54868-5415-0 |
| ENJUVIA (synthetic conjugated estrogens, b) tablet [Repackaged]                            | 54868-6165-1 |
| MENEST (estrogens, esterified) tablet [Repackaged]                                         | 54868-6212-1 |
| FINASTERIDE tablet                                                                         | 55111-172-90 |
| PREMARIN (conjugated estrogens) tablet, film coated [Repackaged]                           | 55154-0217-6 |
| MEDROXYPROGESTERONE ACETATE tablet [Repackaged]                                            | 55289-160-40 |
| SPIRONOLACTONE (spironolactone) tablet, film coated                                        | 59746-218-01 |
| MEDROXYPROGESTERONE ACETATE tablet                                                         | 59762-3742-8 |
| MEDROXYPROGESTERONE ACETATE tablet [Repackaged]                                            | 63629-2612-6 |
| MILI (norgestimate and ethinyl estradiol) kit                                              | 65862-776-92 |
| TRI-MILI (norgestimate and ethinyl estradiol) kit                                          | 65862-777-92 |
| FINASTERIDE tablet, film coated                                                            | 65862-927-99 |
| DIVIGEL (estradiol) gel                                                                    | 68025-066-30 |
| DIVIGEL (estradiol) gel                                                                    | 68025-066-30 |
| SPIRONOLACTONE tablet, film coated [Repackaged]                                            | 68084-208-11 |
| FYAVOLV (norethindrone acetate and ethinyl estradiol) tablet, film coated                  | 68180-828-13 |
| BICALUTAMIDE tablet, film coated                                                           | 68382-224-77 |
| PREMARIN (estrogens, conjugated) tablet, film coated                                       | 0046-1102-91 |
| PREMPHASE (conjugated estrogens and medroxyprogesterone acetate) kit, tablet, sugar coated | 0046-2575-12 |
| SPIRONOLACTONE tablet, film coated                                                         | 0228-2803-96 |
| DIVIGEL (estradiol) gel                                                                    | 0245-0882-30 |
| DIVIGEL (estradiol) gel                                                                    | 0245-0882-30 |
| ESTRADIOL tablet                                                                           | 0378-1458-77 |
| ESTRADIOL patch                                                                            | 0378-3352-16 |
| ESTRADIOL patch                                                                            | 0378-4643-16 |
| ESTRADIOL patch, extended release                                                          | 0781-7144-40 |
| MEDROXYPROGESTERONE ACETATE tablet [Repackaged]                                            | 33261-740-28 |
| MEDROXYPROGESTERONE ACETATE tablet [Repackaged]                                            | 43063-438-42 |

|                                                                  |              |
|------------------------------------------------------------------|--------------|
| CLIMARA (estradiol) patch [Repackaged]                           | 50419-454-01 |
| ORTHO TRI CYCLEN (norgestimate and ethinyl estradiol) kit        | 50458-197-15 |
| SPIRONOLACTONE tablet, film coated [Repackaged]                  | 51079-979-20 |
| SPIRONOLACTONE tablet, film coated                               | 53489-328-10 |
| SPIRONOLACTONE tablet                                            | 53746-514-01 |
| MEDROXYPROGESTERONE ACETATE tablet [Repackaged]                  | 54868-0109-7 |
| PREMARIN (conjugated estrogens) tablet, film coated [Repackaged] | 54868-0453-2 |
| ESTRADIOL tablet [Repackaged]                                    | 54868-4031-3 |
| SPIRONOLACTONE tablet, film coated [Repackaged]                  | 54868-4477-2 |
| CENESTIN - synthetic conjugated estrogens, a tablet, film coated | 54868-5415-1 |
| PREMARIN (conjugated estrogens) tablet, film coated [Repackaged] | 55154-0218-8 |
| MEDROXYPROGESTERONE ACETATE tablet [Repackaged]                  | 55289-160-42 |
| SPIRONOLACTONE (spironolactone) tablet, film coated              | 59746-218-05 |
| SPIRONOLACTONE tablet                                            | 65162-511-60 |
| DIVIGEL (estradiol) gel                                          | 68025-067-01 |
| DIVIGEL (estradiol) gel                                          | 68025-067-01 |
| PREMARIN (estrogens, conjugated) tablet, film coated             | 0046-1103-81 |
| DIVIGEL (estradiol) gel                                          | 0245-0882-66 |
| DIVIGEL (estradiol) gel                                          | 0245-0882-66 |
| ESTRADIOL patch                                                  | 0378-3352-99 |
| ESTRADIOL patch                                                  | 0378-4643-26 |
| ESTRADIOL patch, extended release                                | 0781-7144-58 |
| MEDROXYPROGESTERONE ACETATE tablet [Repackaged]                  | 33261-740-30 |
| MEDROXYPROGESTERONE ACETATE tablet [Repackaged]                  | 43063-438-50 |
| CLIMARA (estradiol) patch [Repackaged]                           | 50419-454-04 |
| ORTHO TRI CYCLEN (norgestimate and ethinyl estradiol) kit        | 50458-197-20 |
| SPIRONOLACTONE tablet, film coated [Repackaged]                  | 51079-980-01 |
| SPIRONOLACTONE tablet, film coated                               | 53489-329-01 |
| SPIRONOLACTONE tablet                                            | 53746-514-05 |
| MEDROXYPROGESTERONE ACETATE tablet [Repackaged]                  | 54868-0109-8 |
| PREMARIN (conjugated estrogens) tablet, film coated [Repackaged] | 54868-0453-4 |
| ESTRADIOL tablet [Repackaged]                                    | 54868-4370-0 |
| SPIRONOLACTONE tablet, film coated [Repackaged]                  | 54868-5015-0 |
| PREMARIN (conjugated estrogens) tablet, film coated [Repackaged] | 55154-0219-8 |

|                                                                  |              |
|------------------------------------------------------------------|--------------|
| MEDROXYPROGESTERONE ACETATE tablet [Repackaged]                  | 55289-160-50 |
| SPIRONOLACTONE tablet                                            | 65162-514-03 |
| DIVIGEL (estradiol) gel                                          | 68025-067-07 |
| DIVIGEL (estradiol) gel                                          | 68025-067-07 |
| PREMARIN (estrogens, conjugated) tablet, film coated             | 0046-1104-51 |
| DIVIGEL (estradiol) gel                                          | 0245-0882-89 |
| DIVIGEL (estradiol) gel                                          | 0245-0882-89 |
| ESTRADIOL patch                                                  | 0378-3360-16 |
| ESTRADIOL patch                                                  | 0378-4644-16 |
| ESTRADIOL patch, extended release                                | 0781-7144-83 |
| MEDROXYPROGESTERONE ACETATE tablet [Repackaged]                  | 43063-438-90 |
| CLIMARA (estradiol) patch [Repackaged]                           | 50419-456-01 |
| SPIRONOLACTONE tablet, film coated [Repackaged]                  | 51079-980-20 |
| SPIRONOLACTONE tablet, film coated                               | 53489-329-02 |
| SPIRONOLACTONE tablet                                            | 53746-514-10 |
| PREMARIN (conjugated estrogens) tablet, film coated [Repackaged] | 54868-0453-5 |
| MEDROXYPROGESTERONE ACETATE tablet [Repackaged]                  | 54868-2984-0 |
| ESTRADIOL tablet [Repackaged]                                    | 54868-4370-1 |
| SPIRONOLACTONE tablet, film coated [Repackaged]                  | 54868-5015-1 |
| SPIRONOLACTONE tablet                                            | 65162-514-06 |
| DIVIGEL (estradiol) gel                                          | 68025-067-30 |
| DIVIGEL (estradiol) gel                                          | 68025-067-30 |
| PREMARIN (estrogens, conjugated) tablet, film coated             | 0046-1104-81 |
| ESTRADIOL patch                                                  | 0378-3360-99 |
| ESTRADIOL patch                                                  | 0378-4644-26 |
| ESTRADIOL patch, extended release                                | 0781-7156-40 |
| CLIMARA (estradiol) patch [Repackaged]                           | 50419-456-04 |
| SPIRONOLACTONE tablet, film coated                               | 53489-329-03 |
| SPIRONOLACTONE tablet                                            | 53746-514-30 |
| PREMARIN (conjugated estrogens) tablet, film coated [Repackaged] | 54868-0453-6 |
| MEDROXYPROGESTERONE ACETATE tablet [Repackaged]                  | 54868-2984-2 |
| ESTRADIOL tablet [Repackaged]                                    | 54868-4370-2 |
| SPIRONOLACTONE tablet, film coated [Repackaged]                  | 54868-5015-2 |
| SPIRONOLACTONE tablet                                            | 65162-514-09 |

|                                                                  |              |
|------------------------------------------------------------------|--------------|
| PREMARIN (estrogens, conjugated) tablet, film coated             | 0046-1104-91 |
| ESTRADIOL patch                                                  | 0378-3361-16 |
| ESTRADIOL patch, extended release                                | 0781-7156-58 |
| CLIMARA (estradiol) patch [Repackaged]                           | 50419-459-01 |
| SPIRONOLACTONE tablet, film coated                               | 53489-329-05 |
| SPIRONOLACTONE tablet                                            | 53746-514-60 |
| PREMARIN (conjugated estrogens) tablet, film coated [Repackaged] | 54868-2702-0 |
| MEDROXYPROGESTERONE ACETATE tablet [Repackaged]                  | 54868-2984-3 |
| SPIRONOLACTONE tablet, film coated [Repackaged]                  | 54868-5015-3 |
| SPIRONOLACTONE tablet                                            | 65162-514-10 |
| ESTRADIOL patch                                                  | 0378-3361-99 |
| ESTRADIOL patch, extended release                                | 0781-7156-83 |
| CLIMARA (estradiol) patch [Repackaged]                           | 50419-459-04 |
| SPIRONOLACTONE tablet, film coated                               | 53489-329-06 |
| SPIRONOLACTONE tablet                                            | 53746-514-90 |
| PREMARIN (conjugated estrogens) tablet, film coated [Repackaged] | 54868-2702-1 |
| MEDROXYPROGESTERONE ACETATE tablet [Repackaged]                  | 54868-2985-0 |
| SPIRONOLACTONE tablet, film coated [Repackaged]                  | 54868-5015-4 |
| SPIRONOLACTONE tablet                                            | 65162-514-11 |
| ESTRADIOL patch, extended release                                | 0781-7167-40 |
| SPIRONOLACTONE tablet, film coated                               | 53489-329-07 |
| SPIRONOLACTONE tablet                                            | 53746-515-01 |
| MEDROXYPROGESTERONE ACETATE tablet [Repackaged]                  | 54868-2985-1 |
| PREMARIN (conjugated estrogens) tablet, film coated [Repackaged] | 54868-4865-0 |
| SPIRONOLACTONE tablet                                            | 65162-514-50 |
| ESTRADIOL patch, extended release                                | 0781-7167-58 |
| SPIRONOLACTONE tablet, film coated                               | 53489-329-10 |
| SPIRONOLACTONE tablet                                            | 53746-515-05 |
| MEDROXYPROGESTERONE ACETATE tablet [Repackaged]                  | 54868-2985-2 |
| PREMARIN (conjugated estrogens) tablet, film coated [Repackaged] | 54868-4865-1 |
| SPIRONOLACTONE tablet                                            | 65162-514-60 |
| ESTRADIOL patch, extended release                                | 0781-7167-83 |
| SPIRONOLACTONE tablet                                            | 53746-515-10 |
| MEDROXYPROGESTERONE ACETATE tablet [Repackaged]                  | 54868-2985-3 |

|                                                                  |              |
|------------------------------------------------------------------|--------------|
| PREMARIN (conjugated estrogens) tablet, film coated [Repackaged] | 54868-4865-2 |
| SPIRONOLACTONE tablet                                            | 65162-515-03 |
| SPIRONOLACTONE tablet                                            | 53746-515-30 |
| PREMARIN (conjugated estrogens) tablet, film coated [Repackaged] | 54868-4865-3 |
| SPIRONOLACTONE tablet                                            | 65162-515-06 |
| SPIRONOLACTONE tablet                                            | 53746-515-60 |
| PREMARIN (conjugated estrogens) tablet, film coated [Repackaged] | 54868-4865-4 |
| SPIRONOLACTONE tablet                                            | 65162-515-09 |
| SPIRONOLACTONE tablet                                            | 53746-515-90 |
| SPIRONOLACTONE tablet                                            | 65162-515-10 |
| SPIRONOLACTONE tablet                                            | 65162-515-11 |
| SPIRONOLACTONE tablet                                            | 65162-515-50 |
| SPIRONOLACTONE tablet                                            | 65162-515-60 |

---

**Supplemental Table 2: NDC codes for medications used for TM gender affirmation**

| <b>Label</b>                                                                   | <b>NDC Code</b> |
|--------------------------------------------------------------------------------|-----------------|
| ANDROID - methyltestosterone capsule                                           | 0187-0902-01    |
| ANDRODERM - testosterone patch                                                 | 52544-076-60    |
| ANDROGEL (testosterone) gel                                                    | 0051-8462-01    |
| ANDROGEL (testosterone) gel                                                    | 0051-8425-01    |
| ANDROGEL (testosterone) gel                                                    | 49884-418-48    |
| ANDROGEL (testosterone) gel [Repackaged]                                       | 50090-1306-0    |
| ANDROGEL (testosterone) gel [Repackaged]                                       | 54569-6337-0    |
| ANDROGEL (testosterone) gel [Repackaged]                                       | 54569-5339-0    |
| ANDROGEL (testosterone) gel [Repackaged]                                       | 54868-4792-0    |
| ANDROGEL (testosterone) gel [Repackaged]                                       | 21695-112-30    |
| AXIRON (testosterone) solution                                                 | 0002-1975-61    |
| AXIRON (testosterone) solution [Repackaged]                                    | 54868-6406-0    |
| DELATESTRYL- testosterone enanthate injection, solution                        | 67979-501-40    |
| DEPO-TESTOSTERONE (testosterone cypionate) injection, solution                 | 0009-0085-10    |
| DEPO-TESTOSTERONE (testosterone cypionate) injection, solution                 | 0009-0347-02    |
| DEPO-TESTOSTERONE (testosterone cypionate) injection, solution                 | 0009-0520-01    |
| DEPO-TESTOSTERONE (testosterone cypionate) injection, solution<br>[Repackaged] | 54569-5301-0    |
| DEPO-TESTOSTERONE (testosterone cypionate) injection, solution<br>[Repackaged] | 54569-1411-0    |
| DEPO-TESTOSTERONE (testosterone cypionate) injection, solution<br>[Repackaged] | 50090-0746-0    |
| DEPO-TESTOSTERONE (testosterone cypionate) injection, solution<br>[Repackaged] | 54868-0216-0    |
| STRIANT (testosterone) tablet                                                  | 52244-030-60    |
| STRIANT (testosterone) tablet                                                  | 55056-3060-1    |
| TESTIM (testosterone) gel                                                      | 66887-001-05    |
| TESTIM (testosterone) gel [Repackaged]                                         | 50090-0875-0    |
| TESTIM (testosterone) gel [Repackaged]                                         | 54569-5595-0    |
| TESTIM (testosterone) gel [Repackaged]                                         | 35356-758-30    |
| TESTIM (testosterone) gel [Repackaged]                                         | 54868-4989-0    |
| TESTIM (testosterone) gel [Repackaged]                                         | 16590-853-30    |



|                                                                                |              |
|--------------------------------------------------------------------------------|--------------|
| AXIRON (testosterone) solution                                                 | 0002-1975-90 |
| DEPO-TESTOSTERONE (testosterone cypionate) injection, solution                 | 0009-0086-01 |
| DEPO-TESTOSTERONE (testosterone cypionate) injection, solution                 | 0009-0417-01 |
| DEPO-TESTOSTERONE (testosterone cypionate) injection, solution                 | 0009-0520-10 |
| ANDROGEL (testosterone) gel                                                    | 0051-8425-30 |
| ANDROGEL (testosterone) gel                                                    | 0051-8462-12 |
| ANDROGEL (testosterone) gel                                                    | 49884-418-72 |
| ANDRODERM - testosterone patch                                                 | 52544-077-30 |
| ANDROGEL (testosterone) gel [Repackaged]                                       | 54569-5339-1 |
| DEPO-TESTOSTERONE (testosterone cypionate) injection, solution<br>[Repackaged] | 54868-0216-1 |
| ANDROGEL (testosterone) gel [Repackaged]                                       | 54868-4810-0 |
| DEPO-TESTOSTERONE (testosterone cypionate) injection, solution                 | 0009-0086-10 |
| DEPO-TESTOSTERONE (testosterone cypionate) injection, solution                 | 0009-0417-02 |
| ANDROGEL (testosterone) gel                                                    | 0051-8450-01 |
| ANDROGEL (testosterone) gel                                                    | 0051-8462-30 |
| ANDROGEL (testosterone) gel                                                    | 49884-510-63 |
| ANDROGEL (testosterone) gel [Repackaged]                                       | 54868-5814-0 |
| ANDROGEL (testosterone) gel                                                    | 0051-8450-30 |
| ANDROGEL (testosterone) gel                                                    | 0051-8462-31 |
| ANDROGEL (testosterone) gel                                                    | 49884-510-72 |
| ANDROGEL (testosterone) gel                                                    | 0051-8488-33 |
| ANDROGEL (testosterone) gel                                                    | 0051-8462-33 |
| ANDROGEL (testosterone) gel                                                    | 0051-8488-88 |

---

**Supplemental Table 3: CPT codes reflecting procedures for TF gender affirmation**

| <b>Procedure name</b>                                                                                                 | <b>Code</b> |
|-----------------------------------------------------------------------------------------------------------------------|-------------|
| Laparoscopy, orchiectomy                                                                                              | 54690       |
| Orchiectomy, simple (including subcapsular), with or without testicular prosthesis, scrotal or inguinal approach      | 54520       |
| Orchiectomy, partial                                                                                                  | 54522       |
| Removal of testis (supposedly for tumor only, but evidence that some may use for routine orchiectomy)                 | 54530       |
| Removal of testis, with exploration (same)                                                                            | 54535       |
| Intersex surgery; male to female                                                                                      | 55970       |
| Mammoplasty, augmentation; without prosthetic implant                                                                 | 19324       |
| Mammoplasty, augmentation; with prosthetic implant                                                                    | 19325       |
| Electrolysis epilation, each 30 minutes                                                                               | 17380       |
| Unlisted procedure, skin, mucous membrane and subcutaneous tissue (when specified as permanent hair removal by laser) | 17999       |
| Amputation of Penis; complete                                                                                         | 54125       |
| Plastic repair of introitus                                                                                           | 56800       |
| Clitoroplasty for intersex state                                                                                      | 56805       |
| Construction of artificial vagina; without graft                                                                      | 57291       |
| Construction of artificial vagina; with graft                                                                         | 57292       |
| Revision (including removal) of prosthetic vaginal graft; vaginal approach                                            | 57295       |
| Revision (including removal) of prosthetic vaginal graft; open abdominal approach                                     | 57296       |
| Revision (including removal) of prosthetic vaginal graft, laparoscopic approach                                       | 57426       |
| Vaginoplasty                                                                                                          | 57335       |
| Colovaginoplasty                                                                                                      | 57291       |
| Colovaginoplasty                                                                                                      | 57292       |
| Clitoroplasty                                                                                                         | 56805       |
| Labioplasty                                                                                                           | 58999       |
| Trachea shave/reduction thyroid chondroplasty                                                                         | 31899       |

**Supplemental Table 4: CPT codes reflecting procedures for TM gender affirmation**

| <b>Procedure</b>                                                                                                           | <b>Code</b> |
|----------------------------------------------------------------------------------------------------------------------------|-------------|
| Laparoscopy, surgical with removal of adnexal structures (partial or total oophorectomy and/or salpingectomy)              | 58661       |
| Salpingo-oophorectomy, complete or partial, unilateral or bilateral                                                        | 58720       |
| Wedge (partial) resection or bisection of ovary, unilateral or bilateral                                                   | 58920       |
| Oophorectomy, partial or total, unilateral or bilateral                                                                    | 58940       |
| Intersex surgery; female to male                                                                                           | 55980       |
| Mastectomy, simple, complete                                                                                               | 19303       |
| Mastectomy, subcutaneous                                                                                                   | 19304       |
| Total abdominal hysterectomy, with or without removal of tube(s), with or without removal of ovary(s)                      | 58150       |
| Total abdominal hysterectomy: with colpo-urethrocystopexy (e.g., Marshall-Machetti-Krantz, Burch)                          | 58152       |
| Supracervical abdominal hysterectomy (subtotal hysterectomy), with or without removal of tube(s), or ovary(s)              | 58180       |
| Vaginal hysterectomy, for uterus 250 grams or less;                                                                        | 58260       |
| Vaginal hysterectomy with removal of tube(s), and/or ovary(s)                                                              | 58262       |
| Vaginal hysterectomy with removal of tube(s), and/or ovary(s), with repair of enterocele                                   | 58263       |
| Vaginal hysterectomy with colpo-urethrocystopexy (with or without endoscopic control)                                      | 58267       |
| Vaginal hysterectomy with repair of enterocele                                                                             | 58270       |
| Vaginal hysterectomy, with total or partial vaginectomy;                                                                   | 58275       |
| Vaginal hysterectomy, with total or partial vaginectomy; with repair of enterocele                                         | 58280       |
| Vaginal hysterectomy, radical (Schauta type operation)                                                                     | 58285       |
| Vaginal hysterectomy, for uterus greater than 250 grams;                                                                   | 58290       |
| Vaginal hysterectomy, for uterus greater than 250 grams; with removal of tube(s) and/or ovary(s)                           | 58291       |
| Vaginal hysterectomy, for uterus greater than 250 grams;with removal of tube(s) and/or ovary(s), with repair of enterocele | 58292       |
| Vaginal hysterectomy, for uterus greater than 250 grams; with colpo-urethrocystopex                                        | 58293       |
| Vaginal hysterectomy, for uterus greater than 250 grams;with repair of enterocele                                          | 58294       |
| Insertion of Testicular Prosthesis                                                                                         | 54660       |
| Vulvectomy, simple; complete                                                                                               | 56625       |
| Vaginectomy, complete removal of vaginal wall                                                                              | 57110       |
| Scrotoplasty; complicated                                                                                                  | 55180       |

**Supplemental Table 5: ICD-9 and ICD-10 codes reflecting procedures for TF gender affirmation**

| <b>Name of Procedure</b>                                                           | <b>ICD 9 Codes</b> | <b>ICD 10 Codes</b> |
|------------------------------------------------------------------------------------|--------------------|---------------------|
| Unilateral orchiectomy                                                             | 62.3               |                     |
| Removal of both testes at same operative episode                                   | 62.41              |                     |
| Removal of remaining testis                                                        | 62.42              |                     |
| Acquired absence of other genital organ                                            |                    | Z90.79              |
| Resection of Right Testis, Open Approach                                           |                    | 0VT90ZZ             |
| Resection of Right Testis, Percutaneous Endoscopic Approach                        |                    | 0VT94ZZ             |
| Resection of Left Testis, Open Approach                                            |                    | 0VTB0ZZ             |
| Resection of Left Testis, Percutaneous Endoscopic Approach                         |                    | 0VTB4ZZ             |
| Resection of Bilateral Testes, Open Approach                                       |                    | 0VTC0ZZ             |
| Resection of Bilateral Testes, Percutaneous Endoscopic Approach                    |                    | 0VTC4ZZ             |
| Personal history of sex reassignment                                               |                    | Z87.890             |
| Augmentation mammoplasty, not otherwise specified                                  | 85.5               |                     |
| Unilateral injection into breast for augmentation                                  | 85.51              |                     |
| Bilateral injection into breast for augmentation                                   | 85.52              |                     |
| Unilateral breast implant                                                          | 85.53              |                     |
| Bilateral breast implant                                                           | 85.54              |                     |
| Fat Graft to Breast                                                                | 85.55              |                     |
| Resection of Scrotum, Open Approach                                                |                    | 0VT50ZZ             |
| Resection of Scrotum, Percutaneous Endoscopic Approach                             |                    | 0VT54ZZ             |
| Resection of Scrotum, External Approach                                            |                    | 0VT5XZZ             |
| Resection of Penis, Open Approach                                                  |                    | 0VTS0ZZ             |
| Resection of Penis, Percutaneous Endoscopic Approach                               |                    | 0VTS4ZZ             |
| Resection of Penis, External Approach                                              |                    | 0VTSXZZ             |
| Vaginal construction                                                               | 70.61              |                     |
| Amputation of Penis                                                                | 64.3               |                     |
| Alteration of Bilateral Breast with Autologous Tissue Substitute, Open Approach    |                    | 0H0V07Z             |
| Alteration of Bilateral Breast with Synthetic Substitute, Open Approach            |                    | 0H0V0JZ             |
| Alteration of Bilateral Breast with Nonautologous Tissue Substitute, Open Approach |                    | 0H0V0KZ             |
| Alteration of Bilateral Breast, Open Approach                                      |                    | 0H0V0ZZ             |

|                                                                                            |       |         |
|--------------------------------------------------------------------------------------------|-------|---------|
| Alteration of Bilateral Breast with Autologous Tissue Substitute, Percutaneous Approach    |       | 0H0V37Z |
| Alteration of Bilateral Breast with Synthetic Substitute, Percutaneous Approach            |       | 0H0V3JZ |
| Alteration of Bilateral Breast with Nonautologous Tissue Substitute, Percutaneous Approach |       | 0H0V3KZ |
| Alteration of Bilateral Breast, Percutaneous Approach                                      |       | 0H0V3ZZ |
| Alteration of Bilateral Breast with Autologous Tissue Substitute, External Approach        |       | 0H0VX7Z |
| Alteration of Bilateral Breast with Synthetic Substitute, External Approach                |       | 0H0VXJZ |
| Alteration of Bilateral Breast with Nonautologous Tissue Substitute, External Approach     |       | 0H0VXKZ |
| Alteration of Bilateral Breast, External Approach                                          |       | 0H0VXZZ |
| Extraction of hair, external approach                                                      |       | 0HDSXZZ |
| Repair vagina, open approach                                                               |       | 0UQG0ZZ |
| Repair Clitoris, Open Approach                                                             |       | 0UQJ0ZZ |
| Repair Clitoris, External Approach                                                         |       | 0UQJXZZ |
| Creation of vagina in male perineum with autologous tissue substitute, open approach       |       | 0W4M070 |
| Creation of vagina in male perineum with synthetic substitute, open approach               |       | 0W4M0J0 |
| Creation of vagina in male perineum with nonautologous tissue substitute, open approach    |       | 0W4M0K0 |
| Creation of vagina in male perineum, open approach                                         |       | 0W4M0Z0 |
| Operations for sex transformation, not elsewhere classified (on penis)                     | 64.5  |         |
| Other mammoplasty                                                                          | 85.59 |         |
| Insertion of breast tissue expander                                                        | 85.95 |         |
| Removal of breast tissue expander                                                          | 85.96 |         |

---

**Supplemental Table 6: ICD-9 and ICD-10 codes reflecting procedures for TM gender affirmation**

| <b>Name of Procedure</b>                                                                 | <b>ICD 9 Codes</b> | <b>ICD 10 Codes</b> |
|------------------------------------------------------------------------------------------|--------------------|---------------------|
| Laparoscopic oophorotomy                                                                 | 65.01              |                     |
| Other oophorotomy                                                                        | 65.09              |                     |
| Laparoscopic unilateral oophorectomy                                                     | 65.31              |                     |
| Other unilateral oophorectomy                                                            | 65.39              |                     |
| Laparoscopic unilateral salpingo-oophorectomy                                            | 65.41              |                     |
| Other unilateral salpingo-oophorectomy                                                   | 65.49              |                     |
| Other removal of both ovaries at same operative episode                                  | 65.51              |                     |
| Other removal of remaining ovary                                                         | 65.52              |                     |
| Laparoscopic removal of both ovaries at same operative episode                           | 65.53              |                     |
| Laparoscopic removal of remaining ovary                                                  | 65.54              |                     |
| Other removal of both ovaries and tubes at same operative episode                        | 65.61              |                     |
| Other removal of remaining ovary and tube                                                | 65.62              |                     |
| Laparoscopic removal of both ovaries and tubes at same operative episode                 | 65.63              |                     |
| Laparoscopic removal of remaining ovary and tube                                         | 65.64              |                     |
| Acquired absence of other genital organ                                                  |                    | Z90.79              |
| Acquired absence of ovaries                                                              |                    | Z90.72              |
| Acquired absence of ovaries, unilateral                                                  |                    | Z90.721             |
| Acquired absence of ovaries, bilateral                                                   |                    | Z90.722             |
| Resection of Right Ovary, Open Approach                                                  |                    | 0UT00ZZ             |
| Resection of Right Ovary, Percutaneous Endoscopic Approach                               |                    | 0UT04ZZ             |
| Resection of Right Ovary, Via Natural or Artificial Opening                              |                    | 0UT07ZZ             |
| Resection of Right Ovary, Via Natural or Artificial Opening Endoscopic                   |                    | 0UT08ZZ             |
| Resection of Right Ovary, Via Natural or Artificial Opening With Percutaneous Assistance |                    | 0UT0FZZ             |
| Resection of Left Ovary, Open Approach                                                   |                    | 0UT10ZZ             |
| Resection of Left Ovary, Percutaneous Endoscopic Approach                                |                    | 0UT14ZZ             |
| Resection of Left Ovary, Via Natural or Artificial Opening                               |                    | 0UT17ZZ             |
| Resection of Left Ovary, Via Natural or Artificial Opening Endoscopic                    |                    | 0UT18ZZ             |
| Resection of Left Ovary, Via Natural or Artificial Opening With Percutaneous Assistance  |                    | 0UT1FZZ             |
| Resection of Bilateral Ovaries, Open Approach                                            |                    | 0UT20ZZ             |
| Resection of Bilateral Ovaries, Percutaneous Endoscopic Approach                         |                    | 0UT24ZZ             |

|                                                                                                |       |         |
|------------------------------------------------------------------------------------------------|-------|---------|
| Resection of Bilateral Ovaries, Via Natural or Artificial Opening                              |       | 0UT27ZZ |
| Resection of Bilateral Ovaries, Via Natural or Artificial Opening Endoscopic                   |       | 0UT28ZZ |
| Resection of Bilateral Ovaries, Via Natural or Artificial Opening With Percutaneous Assistance |       | 0UT2FZZ |
| Personal history of sex reassignment                                                           |       | Z87.890 |
| Excision or destruction of breast tissue, not otherwise specified                              | 85.2  |         |
| Subtotal mastectomy                                                                            | 85.23 |         |
| Unilateral reduction mammoplasty                                                               | 85.31 |         |
| Bilateral reduction mammoplasty                                                                | 85.32 |         |
| Other unilateral subcutaneous mammectomy                                                       | 85.34 |         |
| Other bilateral subcutaneous mammectomy                                                        | 85.36 |         |
| Unilateral simple mastectomy                                                                   | 85.41 |         |
| Bilateral simple mastectomy                                                                    | 85.42 |         |
| Unilateral extended simple mastectomy                                                          | 85.43 |         |
| Bilateral extended simple mastectomy                                                           | 85.44 |         |
| Unilateral radical mastectomy                                                                  | 85.45 |         |
| Bilateral radical mastectomy                                                                   | 85.46 |         |
| Unilateral extended radical mastectomy                                                         | 85.47 |         |
| Bilateral extended radical mastectomy                                                          | 85.48 |         |
| Resection of Right Breast, Open Approach                                                       |       | 0HTT0ZZ |
| Resection of Left Breast, Open Approach                                                        |       | 0HTU0ZZ |
| Resection of Bilateral Breast, Open Approach                                                   |       | 0HTV0ZZ |
| Resection of Vagina, Open Approach                                                             |       | 0UTG0ZZ |
| Resection of Vagina, Percutaneous Endoscopic Approach                                          |       | 0UTG4ZZ |
| Resection of Vagina, Via Natural or Artificial Opening                                         |       | 0UTG7ZZ |
| Resection of Vagina, Via Natural or Artificial Opening Endoscopic                              |       | 0UTG8ZZ |
| Obliteration and total excision of vagina                                                      | 70.4  |         |
| Construction of penis                                                                          | 64.43 |         |
| Insertion or replacement of non-inflatable penile prosthesis                                   | 64.95 |         |
| Insertion or replacement of inflatable penile prosthesis                                       | 64.97 |         |
| Excision of Bilateral Breast, Open Approach                                                    |       | 0HBV0ZZ |
| Excision of Bilateral Breast, Percutaneous Approach                                            |       | 0HBV3ZZ |
| Excision of Bilateral Breast, Via Natural or Artificial Opening                                |       | 0HBV7ZZ |

|                                                                                                                   |       |         |
|-------------------------------------------------------------------------------------------------------------------|-------|---------|
| Excision of Bilateral Breast, Via Natural or Artificial Opening Endoscopic                                        |       | 0HBV8ZZ |
| Excision of Bilateral Breast, External Approach, Diagnostic                                                       |       | 0HBVXZX |
| Resection of bilateral fallopian tubes, Open Approach                                                             |       | 0UT70ZZ |
| Resection of bilateral fallopian tubes, Percutaneous Endoscopic Approach                                          |       | 0UT74ZZ |
| Resection of bilateral fallopian tubes, Via Natural or Artificial Opening                                         |       | 0UT77ZZ |
| Resection of bilateral fallopian tubes, Via Natural or Artificial Opening Endoscopic                              |       | 0UT78ZZ |
| Resection of bilateral fallopian tubes, Via Natural or Artificial Opening With Percutaneous Endoscopic Assistance |       | 0UT7FZZ |
| Resection of uterus, Open Approach                                                                                |       | 0UT90ZZ |
| Resection of uterus, Percutaneous Endoscopic Opening                                                              |       | 0UT94ZZ |
| Resection of uterus, Via Natural or Artificial Opening                                                            |       | 0UT97ZZ |
| Resection of uterus, Via Natural or Artificial Opening Endoscopic                                                 |       | 0UT98ZZ |
| Resection of uterus, Via Natural or Artificial Opening With Percutaneous Endoscopic Assistance                    |       | 0UT9FZZ |
| Resection of cervix, Open Approach                                                                                |       | 0UTC0ZZ |
| Resection of cervix, Percutaneous Endoscopic Opening                                                              |       | 0UTC4ZZ |
| Resection of cervix, Via Natural or Artificial Opening                                                            |       | 0UTC7ZZ |
| Resection of cervix, Via Natural or Artificial Opening Endoscopic                                                 |       | 0UTC8ZZ |
| Resection of clitoris, Open Approach                                                                              |       | 0UTJ0ZZ |
| Resection of clitoris, External Approach                                                                          |       | 0UTJXZZ |
| Resection of vulva, Open Approach                                                                                 |       | 0UTM0ZZ |
| Resection of vulva, External Approach                                                                             |       | 0UTMXZZ |
| Creation of penis in female perineum with autologous tissue substitute, open approach                             |       | 0W4N071 |
| Creation of penis in female perineum with synthetic substitute, open approach                                     |       | 0W4N0J1 |
| Creation of penis in female perineum with nonautologous tissue substitute, open approach                          |       | 0W4N0K1 |
| Creation of penis in female perineum, open approach                                                               |       | 0W4N0Z1 |
| Insertion of Testicular Prosthesis                                                                                | 62.7  |         |
| Insertion of testicular prosthesis                                                                                | 64.95 |         |
| Amputation of cervix                                                                                              | 67.4  |         |
| Removal of both fallopian tubes at same operative episode                                                         | 66.51 |         |
| Laparoscopic supracervical hysterectomy                                                                           | 68.31 |         |
| Other and unspecified subtotal abdominal hysterectomy                                                             | 68.39 |         |
| Laparoscopic total abdominal hysterectomy                                                                         | 68.41 |         |



|                                                                                      |       |         |
|--------------------------------------------------------------------------------------|-------|---------|
| Other and unspecified total abdominal hysterecto                                     | 68.49 |         |
| Laparoscopically assisted vaginal hysterectomy                                       | 68.51 |         |
| Other and unspecified vaginal hysterectomy                                           | 68.59 |         |
| Laparoscopic radical abdominal hysterectomy                                          | 68.61 |         |
| Other and unspecified radical abdominal hysterectomy                                 | 68.69 |         |
| Laparoscopic radical vaginal hysterectomy                                            | 68.71 |         |
| Other and unspecified radical vaginal hysterectomy                                   | 68.79 |         |
| Other and unspecified hysterectomy                                                   | 68.9  |         |
| Replacement of bilateral testes with synthetic substitute, open approach             |       | 0VRC0JZ |
| Supplement penis with autologous tissue substitute, Open Approach                    |       | 0VUS07Z |
| Supplement penis with autologous tissue substitute, Percutaneous Endoscopic Approach |       | 0VUS47Z |
| Supplement penis with autologous tissue substitute, External Approach                |       | 0VUSX7Z |
| Supplement penis with synthetic substitute, Open Approach                            |       | 0VUS0JZ |
| Supplement penis with synthetic substitute, Percutaneous Endoscopic Approach         |       | 0VUS4JZ |
| Supplement penis with synthetic substitute, External Approach                        |       | 0VUSXJZ |
| Supplement penis with nonautologous tissue substitute, Open Approach                 |       | 0VUS0KZ |
| Supplement penis with nonautologous tissue substitute, Percutaneous Approach         |       | 0VUS4KZ |
| Supplement penis with nonautologous tissue substitute, External Approach             |       | 0VUSXKZ |

---
